1 **Chromosome-level genome and the identification of sex**  
2 **chromosomes in *Uloborus diversus*.**

3

4

5 **Authors:** Jeremiah Miller<sup>1</sup>, Aleksey V Zimin<sup>2,3</sup>, Andrew Gordus<sup>1,4</sup>

6

7

8 <sup>1</sup> Department of Biology, Johns Hopkins University, Baltimore, MD

9 <sup>2</sup> Department of Biomedical Engineering, Johns Hopkins University, Baltimore, MD

10 <sup>3</sup> Center for Computational Biology, Johns Hopkins University, Baltimore, MD

11 <sup>4</sup> Solomon H. Snyder Department of Neuroscience, Johns Hopkins University, Baltimore, MD

12

13

14

15 **Abstract**

16

17 The orb-web is a remarkable example of animal architecture that is observed in families of  
18 spiders that diverged over 200 million years ago. While several genomes exist for Araneid orb-  
19 weavers, none exist for other orb-weaving families, hampering efforts to investigate the genetic  
20 basis of this complex behavior. Here we present a chromosome-level genome assembly for the  
21 cribellate orb-weaving spider *Uloborus diversus*. The assembly reinforces evidence of an  
22 ancient arachnid genome duplication and identifies complete open reading frames for every  
23 class of spidroin gene, which encode the proteins that are the key structural components of  
24 spider silks. We identified the two X chromosomes for *U. diversus* and identify candidate sex-  
25 determining genes. This chromosome-level assembly will be a valuable resource for  
26 evolutionary research into the origins of orb-weaving, spidroin evolution, chromosomal  
27 rearrangement, and chromosomal sex-determination in spiders.

28

29

30

31

32

33

34

## 35 Introduction

36 Spiders are among the most successful and diverse terrestrial predators on Earth. Almost 400  
37 million years of evolution has produced more than 50,000 extant spider species representing  
38 128 families that are distributed over every continent except Antarctica(Gloor et al. 2017). The  
39 success of these animals is due in part to the diversity of behaviors that have evolved to capture  
40 prey in different environments(Vollrath and Selden 2007). Many spiders attack their prey by  
41 physically grabbing and immobilizing them with venom and use their silk exclusively for egg  
42 sacs. Others use silk to line their burrows, or construct webs of varying geometry and  
43 composition to detect or entrap prey. The diversity of web use correlates with a diversity of  
44 spidroin proteins that form silk, as well as the glands that produce these proteins(Vollrath and  
45 Selden 2007; Blackledge et al. 2009; Gatesy et al. 2001; Foelix 2011; Vollrath 1999). Spiders  
46 such as orb-weavers alternate between glands depending upon the web feature they are  
47 constructing. For example, load bearing parts of the web such as the radii are composed of  
48 major ampullate silk that has high tensile strength, whereas the anchors are made up of  
49 pyriform silk which is sticky and amorphous(Foelix 2011).

50 Remarkably, the orb web is not restricted to a single monophyletic group, but is observed in two  
51 lineages that diverged 250 million years ago, leading to considerable debate about its  
52 evolutionary origins(Blackledge et al. 2009; Fernández et al. 2018; Coddington et al. 2019;  
53 Kallal et al. 2021) (**Figure 1**). Araneoidea is the largest superfamily of orb weavers, which have  
54 evolved adhesive aggregate spidroins that are used in the capture spiral to adhere prey to the  
55 web(Gatesy et al. 2001; Sahni et al. 2010; Opell and Hendricks 2010; Hayashi and Lewis 2000,  
56 1998). However, uloborids also build orb webs, but use a more ancient cribellate spidroin in  
57 their capture spiral to immobilize prey(Peters 1992, 1984; Blackledge and Hayashi 2006;  
58 Piorkowski et al. 2020). In addition to Uloboridae, other families such as Deinopidae, and  
59 Oecobiidae + Hersiliidae (UDOH grade in **Figure 1**) also build orb-webs, but with more derived  
60 behavioral and structural characteristics(Coddington 1986). Orb-weaving is an innate behavior,  
61 with discrete stages of web construction that are shared between araneoid and non-araneoid  
62 orb-weavers(Zschokke and Vollrath 1995). When exposed to neuroactive compounds, the  
63 behaviors within specific stages are altered, indicating that the neuronal targets of these  
64 compounds are more important for certain stages than for others(Witt and Reed 1965;  
65 Hesselberg and Vollrath 2004; Reed et al. 1982). This behavioral paradigm offers an excellent  
66 model for understanding not only how complex behaviors can be organized in a small  
67 brain(Corver et al. 2021), but also how such behaviors evolve.

68

69 However, a genetic understanding of the evolution of orb weaving behavior is hampered by a  
70 lack of sequenced genomes for non-araneoid families. Spider genomes are enormous with high  
71 repeat content, making them challenging to assemble(Sanggaard et al. 2014; Stellwagen and  
72 Renberg 2019; Ayoub et al. 2013). While 22 spider genomes have been assembled and made  
73 publicly available(Sanggaard et al. 2014; Babb et al. 2017; Kono et al. 2019; Sheffer et al. 2021;  
74 Sánchez-Herrero et al. 2019; Schwager et al. 2017; Fan et al. 2021; Yu et al. 2019; Liu et al.  
75 2019; Escuer et al. 2022; Cerca et al. 2021; Zhu et al. 2022; Hendrickx et al. 2022; Kono et al.  
76 2021a; Purcell and Pruitt 2019; Li et al. 2022; Kono et al. 2021b) (**Table S1**), most are highly  
77 fragmented, with 6 assembled to chromosome-scale(Sheffer et al. 2021; Fan et al. 2021;  
78 Escuer et al. 2022; Zhu et al. 2022; Hendrickx et al. 2022; Kono et al. 2021b). Of the 22  
79 genomes, only 7 represent the Araneoidea(Kono et al. 2019; Sheffer et al. 2021; Fan et al.

80 2021; Kono et al. 2021a) or cribellate orb-weavers, 2 of which have been assembled to  
81 chromosome-scale (Sheffer et al. 2021; Fan et al. 2021). There are no published genomes for  
82 the UDOH clade, and only 1 genome represents a member of the cribellate RTA clade (**Figure**  
83 **1B**) (Garb et al. 2018). Chromosome-level assemblies are essential for understanding  
84 evolutionary divergence and identifying sites of chromosomal reorganization that play roles in  
85 adaptation and speciation.

86 Spiders have multiple sex chromosomes, with ♂X<sub>1</sub>X<sub>2</sub>/♀X<sub>1</sub>X<sub>1</sub>X<sub>2</sub>X<sub>2</sub> being the most common sex  
87 determination observed. Sex chromosome dosage compensation has evolved multiple times,  
88 but all known genetic mechanisms are for single sex chromosome systems. A molecular  
89 understanding of dosage compensation in spiders is lacking, in part due to a paucity of sex-  
90 associated genetic loci.

91 *Uloborus diversus* (**Figure 1A**) of the UDOH clade, is a cribellate orb weaving spider native to  
92 the desert Southwest in the United States (Eberhard 1971) and an important model for  
93 understanding the evolution of spidroins and orb-weaving (Garb et al. 2018). The existence of a  
94 non-araneoid orb-weaving genome is crucial for addressing the evolutionary origins of orb-  
95 weaving. Recent work has demonstrated the utility of this species as a model system for  
96 understanding orb-weaving behavior (Corver et al. 2021). This, combined with the potential to  
97 compare both behaviors and their genetic underpinnings across divergent species of orb-  
98 weavers offers a rich opportunity to understand the underlying genetics that encode this  
99 behavior, and whether orb-weaving behaviors are conserved or convergently evolved. Here, we  
100 report a high-quality, chromosome-scale draft genome assembly of *Uloborus diversus* (NCBI:  
101 txid327109), as well as a complementary transcriptome assembly and gene annotations. This  
102 genome enabled the identification of full >10kb spidroin genes, as well as the identification of  
103 sex chromosomes for this species. This chromosome-level assembly will be a valuable resource  
104 for evolutionary research into the origins of orb-weaving, spidroin evolution, chromosomal  
105 rearrangement, and chromosomal sex-determination in spiders.

106

107

## 108 **Results**

109

### 110 **Genome Sequencing**

111

112 We sequenced and assembled a high-quality, chromosome-scale genome assembly for  
113 *Uloborus diversus* using a hybrid approach that leveraged the complementary benefits of  
114 multiple technologies. The genome of *U. diversus* contains long regions of low-complexity  
115 sequence, which hinders assembly using short-reads alone, as well as extremely long protein-  
116 coding genes, which makes long-reads necessary for a reference-quality assembly(Ayoub et al.  
117 2013; Sanggaard et al. 2014; Babb et al. 2017; Kono et al. 2019; Stellwagen and Renberg  
118 2019; Sheffer et al. 2021). Illumina sequencing provides high sequence fidelity but short read  
119 lengths, while ONT sequencing provides long read lengths, useful for scaffolding and spanning  
120 long, low complexity regions, but lower sequence fidelity(Giani et al. 2020). PacBio HiFi  
121 sequencing provides an excellent combination of long read lengths and high sequence fidelity,  
122 however, we were able to produce multiple megabase-long reads with ONT, which is not  
123 possible with PacBio. Each of these sequencing technologies provided unique advantages for  
124 improving the overall assembly.

125

126 To limit genetic variation, we used sequencing data from only 5 unmated female spiders in our  
127 assembly. We used Illumina to obtain high fidelity read data with from a single female spider,  
128 generating 795M 150 bp read pairs totaling 119.3 Gb. Because Illumina short reads are not  
129 sufficiently long to span long, highly repetitive regions encountered in spider genomes, we  
130 sequenced 3 ONT libraries, each from a single female, generating 14.7M reads totaling 98.4  
131 Gb, with a read N50 of 6.7 kb. To obtain long sequencing reads with high sequence fidelity, we  
132 also sequenced a single adult female using PacBio HiFi, generating 35M subreads totaling  
133 412.8 Gb with a read N50 of 12.8 kb, which yielded 2M consensus reads totaling 26 Gb with a  
134 read N50 of 13.0 kb. To investigate the sex determination system in *U. diversus*, we also  
135 generated an Illumina library from a single adult male, producing 937M 50 bp read pairs totaling  
136 46.8 Gb. Sequencing library statistics are available in **Table 1**.

137

### 138 **Genome Size, Heterozygosity, and Coverage Estimation**

139

140 To assess the size and heterozygosity of the genome, we used Jellyfish(Marçais and Kingsford  
141 2011) to count the frequency of canonical 21-mers in our adult female Illumina sequencing  
142 reads and used the 21-mer distribution as input to GenomeScope(Ranallo-Benavidez et al.  
143 2020). The resulting model estimated a genome size of 1.98 Gb with a heterozygosity of 1.38%  
144 and 50.2% of the genome occurring as unique sequence (**Figure 2**), similar to other spider  
145 genomes (**Supplementary Table S1**)(Sanggaard et al. 2014; Babb et al. 2017; Kono et al.  
146 2019; Sheffer et al. 2021; Sánchez-Herrero et al. 2019; Schwager et al. 2017; Fan et al. 2021;  
147 Yu et al. 2019; Liu et al. 2019). Given this genome size, our Illumina sequencing yielded 63x

148 coverage, our ONT sequencing yielded 68x coverage, and our PacBio HiFi yielded 208x in raw  
149 read coverage and 13x in consensus read coverage (**Table 1**).

150

### 151 **Karyotype of *U. diversus***

152

153 To infer the expected number of pseudo-chromosomes in our final assembly, we determined the  
154 number of chromosomes in *U. diversus* using metaphase karyotyping. Mitotic chromosome  
155 spreads from developing embryos displayed two distinct patterns of chromosome number;  
156 either 18 or 20 (**Figure 3A**), consistent with ♂X<sub>1</sub>X<sub>2</sub>/♀X<sub>1</sub>X<sub>1</sub>X<sub>2</sub>X<sub>2</sub> sex determination, which is the  
157 most common form of sex determination observed in spiders(Sember et al. 2020). Thus, *U.*  
158 *diversus* appears to have 8 autosomes and 2 sex chromosomes.

159

### 160 **De novo Nuclear Genome Assembly**

161

162 First, we used MaSuRCA(Zimin et al. 2013, 2017) to produce an initial assembly (*U. diversus*  
163 v.1.0) using Illumina short-read data scaffolded by ONT long-read data, consisting of 68,259  
164 scaffolds spanning 3.22 Gb. The scaffold N50 was 98,014 bp and the scaffold L50 was 6,558  
165 (**Table 2**), with 94.7% of complete BUSCOs (**Table 3**). The inferred redundancy accounts for  
166 the significant increase in the length of the assembly compared to the expected genome size.  
167 High heterozygosity leads to alternative haplotypes that can often be misassembled into their  
168 own contigs.

169

170 Next, we used Rascaf(Song et al. 2016) to improve continuity and ordering of scaffolds in the  
171 initial MaSuRCA assembly. Rascaf uses paired-end RNA-seq reads to improve the contiguity of  
172 gene models and scaffolds. We observed a modest improvement, reducing the number of  
173 scaffolds from 68,259 to 63,265 with the scaffold N50 increasing from 98,014 bp to 108,431 bp  
174 and the scaffold L50 decreasing from 6,885 to 5,994, with no change in the assembly span  
175 (**Table 2**). However, despite identifying 95.4% of BUSCOs, 22.5% were duplicated (**Table 3**).  
176 This, combined with the large span of the genome, indicated a high degree of redundancy in the  
177 assembly.

178

179 To filter out redundant heterozygous contigs we used Pseudohaploid(Chen et al. 2019b).  
180 Pseudohaploid filters suspected homologous contigs and selects a single representative contig  
181 where high rates of heterozygosity prevent assemblers from appropriately identifying  
182 haplotypes. We reduced the number of scaffolds by 23.1%, with an increase in scaffold N50 and  
183 a decreased span from 3.22 Gb to 2.8 Gb (**Table 2**) and a drop in duplicated BUSCOs to 16.7%  
184 (**Table 3**). This suggests that Pseudohaploid was able to accurately collapse much of the  
185 redundant sequence attributable to alternative haplotypes.

186

187 To further improve our assembly, we sequenced using PacBio HiFi and assembled the resulting  
188 HiFi reads with PacBio's IPA (Improved Phased Assembly) pipeline, resulting in a substantial  
189 decrease in the new assembly span, from 2.8 Gbp to only 2.1 Gbp. The number of scaffolds in  
190 this assembly was only 9,734, a remarkable improvement. The scaffold N50 in the IPA  
191 assembly was 328,082 bp and the scaffold L50 in the IPA assembly was 1,789 (**Table 2**). The  
192 BUSCO score for the IPA assembly indicated that this assembly contained 92.3% of BUSCOs  
193 complete (83.7% in single copy, 9.3% duplicated) (**Table 3**).

194  
195 We then used SAMBA(Zimin and Salzberg 2022) to merge the previous MaSuRCA assembly  
196 with the IPA assembly. SAMBA used scaffolds from the MaSuRCA assembly to merge the  
197 scaffolds in the IPA assembly. The new assembly had a length of 2.1 Gbp from only 7,197  
198 scaffolds, with a scaffold N50 of 496,769 bp (**Table 2**), and 94% complete BUSCOs (**Table 3**).

199  
200 To generate a chromosome-level assembly, we used HiRise to scaffold the IPA+MaSuRCA  
201 assembly with a Dovetail Hi-C library(Putnam et al. 2016). Scaffolding did not change the  
202 amount of sequencing in the assembly; however, the total number of scaffolds was reduced by  
203 78% to only 1,586 scaffolds, with a remarkable improvement in scaffold N50, which increased to  
204 185,519,777 bp in the Hi-C scaffolded assembly (**Table 2, Figure 3C**). Most importantly, 88% of  
205 the total assembly was represented by 10 large scaffolds that comprise 1.9 Gbp (**Figure 3B**),  
206 matching the expected number of chromosomes (**Figure 3A**). The BUSCO score for the final  
207 assembly showed 94.8% of the BUSCOs were complete (with 85.2% in single copy, 9.6%  
208 duplicated) (**Table 3**). Our final chromosome-level genome assembly statistics are consistent  
209 with previously published spider genomes, with 10 scaffolds representing the 10 chromosomes  
210 and high scaffold N50(Sanggaard et al. 2014; Babb et al. 2017; Kono et al. 2019; Sheffer et al.  
211 2021; Sánchez-Herrero et al. 2019; Schwager et al. 2017; Fan et al. 2021; Yu et al. 2019; Liu et  
212 al. 2019) (**Supplementary Table S1**). We will refer to these 10 scaffolds as  
213 pseudochromosomes.

214

## 215 **Repeat Annotation**

216 To characterize repetitive sequences, we constructed a species-specific repeat library using  
217 RepeatModeler2(Flynn et al. 2020) This library was used in conjunction with the RepBase  
218 RepeatMasker Edition(Bao et al. 2015) database for masking the genome. RepeatMasker  
219 analysis of the combined *U. diversus* and RepBase repeats masked 66.6% of the final *U.*  
220 *diversus* genome assembly. Many (29.27%) of the repetitive regions were unclassified;  
221 however, DNA transposons accounted for a similar proportion (22.73%). Retroelements  
222 accounted for a much smaller proportion (7.7%). Total interspersed repeats account for 59.7%  
223 and simple repeats cover 2.61% of the genome (**Table 4**). The disparity between the  
224 GenomeScope estimation of 49.8% repetitive sequence and the RepeatMasker estimation of  
225 66.6% suggests that the repeat content may be underestimated by GenomeScope. Therefore,  
226 the genome size may also be underestimated by GenomeScope. Because the length of the *U.*  
227 *diversus* genome is slightly less than the prediction by GenomeScope, this possibility suggests  
228 that the length of the assembly may more closely represent the true length of the *U. diversus*

229 genome than the GenomeScope prediction. The repeat content is typical of spider genomes  
230 (**Supplemental Table S2**).

231

## 232 **Transcriptome Sequencing and Assembly**

233

234 To identify protein-coding genes, we assembled a transcriptome. To capture a wide range of  
235 transcripts, we extracted RNA from spiders at multiple developmental stages and from male and  
236 female adults. We produced an Illumina short-read sequencing library from: a whole adult  
237 female, a whole adult male, the dissected prosoma (cephalothorax) from an adult female, the  
238 dissected opisthosoma (abdomen) from the same adult female, the dissected prosoma from an  
239 adult male, the dissected opisthosoma from the same adult male, the pooled legs from the  
240 dissected male and female, a single 4th instar female, and approximately 30 pooled 2nd instars.  
241 302M read pairs were generated, totaling 45.4 Gbp.

242 We used Trinity(Haas et al. 2013) to assemble a genome-guided transcriptome. We then used  
243 TransDecoder(Haas et al. 2013) to find coding regions within our transcripts. We included  
244 homology searches to known proteins using both BLAST (Basic Local Alignment Search  
245 Tool)(Altschul et al. 1990; Altschul 1997) and Pfam(Mistry et al. 2021) searches. We assessed  
246 the BUSCO score of the long ORFs predicted by TransDecoder, finding that 90.9% of the  
247 BUSCOs were present and complete, with 54.8% single copy and 36.1% duplicated, with 1.5%  
248 present but fragmented and 7.6% missing. (**Table 3**).

249

## 250 **Protein-Coding Gene Annotation**

251 For protein coding gene annotations, we used BRAKER2(Hoff et al. 2016; Brůna et al. 2021)  
252 with our RNAseq data and homology evidence using a custom library of spider proteins  
253 obtained from NCBI (**Supplemental Table S3**). The number of predicted genes in the final *U.*  
254 *diversus* assembly was 44,408; with 40,466 models predicted on the 10 pseudochromosomes  
255 (**Table 5**), with 86.7% of complete BUSCOs. To functionally annotate these genes, we used  
256 Interproscan(Quevillon et al. 2005; Jones et al. 2014) to annotate the longest CDS for each  
257 gene. 30,911 models were assigned a domain or function from one or more of the databases  
258 used (**Table 6**).

259

## 260 **Non-Coding RNA Annotation**

261

262 We used tRNAscan-SE(Chan and Lowe 2019; Chan et al. 2021) to annotate transfer RNAs. We  
263 found 3,084 tRNAs coding for the standard 20 amino acids and 14 tRNAs coding for  
264 selenocysteine (TCA) tRNAs. We found 21 tRNAs with undetermined or unknown isotypes, 537  
265 tRNAs with mismatched isotypes, and 57,824 putative tRNA pseudogenes. We identified no  
266 putative suppressor tRNAs. We used Barrnap(Seeman 2018) to annotate ribosomal rRNAs. We  
267 found 114 rRNAs, of which 100 were located on the 10 pseudo-chromosomes. These included:  
268 6 copies of the 18S subunit, with 4 on pseudochromosomes; 83 copies of the 5S subunit, with

269 81 on pseudochromosomes; 6 copies of the 5.8S subunit, with 2 on pseudochromosomes; and  
270 19 copies of the 28S subunit, with 13 pseudochromosomes.

271

## 272 **Mitogenome Assembly**

273 Animal mitochondrial genomes comprise 37 genes: 13 protein coding genes, 22 tRNAs, 2  
274 rRNAs, and at least one control region(Boore 1999). We assembled the mitochondrial genome  
275 sequence with NOVOplasty(Dierckxsens et al. 2016) using the adult female Illumina DNA seq  
276 data and each of the mitochondrial genome sequences listed in **Supplemental Table S4** as  
277 sources for seed sequences(Wang et al. 2019b; Zhu and Zhang 2017; Wang et al. 2014; Liu et  
278 al. 2015; Fang et al. 2016; Masta and Boore 2008; Kumar et al. 2020; Li et al. 2016; Qiu et al.  
279 2005; Pan et al. 2014; Kim et al. 2014; Pan et al. 2016; Tian et al. 2016; Wang et al. 2016a).  
280 Each run produced the same single, circularized 14,737 bp mitochondrial sequence, consistent  
281 with the expected size for an arachnid mitochondrial sequence(Boore 1999). We annotated the  
282 sequence with the MITOS2 web server(Bernt et al. 2013) and found all 13 of the expected  
283 protein coding genes, 20 of 22 tRNAs, 2 rRNAs, and the control region (**Fig. 3E**). All identified  
284 tRNAs were truncated and lacked T-arms, which is unique to spiders and has been observed in  
285 other species(Masta and Boore 2008; Wang et al. 2016b; Li et al. 2016; Pons et al. 2019).

286

287

## 288 **Identification and Analysis of Spidroins**

289

290 Spidroins are a unique class of proteins that are the primary components of spider silk. While all  
291 spiders produce silk, spidroins have evolved for different uses in web-making. Orb-weavers in  
292 particular evolved several silk glands that each produce a different repertoire of spidroins to  
293 make different silks with varying utility. Several cribellate Araneidae spidroins have been  
294 sequenced, and many of these spidroins are also made by cribellate orb-weavers such as *U.*  
295 *diversus*. However, cribellate spiders evolved a unique type of hydrated flagelliform silk for their  
296 capture spiral, whereas cribellate spiders such as *U. diversus* use a dry cribellate silk in their  
297 capture spirals.

298 Spider dragline silk has the strongest stress and strain capabilities of any known substance.  
299 Interest in silk properties extends beyond their evolved use, as silk has many potential human  
300 applications in both industry and medicine(Kumari et al. 2020; Xu et al. 2019; Öksüz et al. 2021;  
301 Choi and Choy 2020; Mayank et al. 2022; Liu et al. 2020; Lewis 2006; Teulé et al. 2007).  
302 However, the genetic characterization of spidroins is often challenging due to their exceptional  
303 length (coding regions >5 kb) and high repeat content(Stellwagen and Renberg 2019). The  
304 annotation of these genes is difficult and often fragmented because reads rarely span the entire  
305 length of these genes. With the exceptional contiguity and read depth of our assembly, due to  
306 the diversity of sequencing technologies employed, we identified the entire open-read frames of  
307 all major spidroins in the *U. diversus* genome.

308 We found 10 full-length candidate sequences, including at least one candidate for each of the  
309 seven types of spidroin used by cribellate orb-weavers. There were no gaps in the assembly  
310 interrupting any of our candidate spidroin sequences. We performed read mapping to validate



311 the continuity of each full-length sequence and ensure that the predicted sequences were not  
312 chimeric. In 8 cases, including 3 minor spidroin (MiSp) candidates, a major spidroin (MaSp)  
313 MaSp-1 candidate, 2 MaSp-2 candidates, a tubuliform spidroin (TuSp) candidate, and an  
314 aciniform spidroin (AcSp) candidate, the full length of the predicted genomic region was  
315 spanned entirely by at least one HiFi consensus read. In the remaining 3 cases, consisting of a  
316 pyriform spidroin (PySp) candidate, a cribellate spidroin CrSp candidate, and a  
317 pseudoflagelliform spidroin (Pflag) candidate, no more than 2 HiFi reads were necessary to  
318 span the entirety of the predicted genomic region, and in each of these cases there was  
319 sufficient depth and overlap in the reads to call the region with high confidence (see  
320 **Supplemental Figure S1**). The length of the coding regions for the spidroins ranged from 5.5  
321 kb to 20 kb. This is consistent with expectations of full-length sequences found in other  
322 spiders(Babb et al. 2017; Kono et al. 2019, 2020). Only in the case of MaSp-1 were we unable  
323 to call a complete, full-length sequence. The finalized spidroin annotations included only two  
324 spidroins with multiple exons: CrSp and MaSp-1; however, the structure of MaSp1 remains  
325 unclear. All other spidroins were found to be single exon sequences. While most single-exon  
326 genes tend to be small highly expressed proteins such as histones, spidroins are a rare  
327 exception. The single exon structure of spidroin genes has been noted in other species(Ayoub  
328 et al. 2013; Kono et al. 2020; Garb and Hayashi 2005; Motriuk-Smith et al. 2005; Ayoub and  
329 Hayashi 2008; Liu et al. 2022; Wen et al. 2020; Wang et al. 2019a; Wen et al. 2017).

330

### 331 *Aciniform spidroin (AcSp)*

332

333 Aciniform silk is one of the toughest spider silks, and is typically used for wrapping  
334 prey(Tremblay et al. 2015). A single exon for AcSp was identified on Chromosome 7 (**Figure 4A**  
335 and **Table 7**), consistent with the sequences in the Araneid orb-weaving spiders *Araneus*  
336 *ventricosus*(Wen et al. 2018) and *Argiope agentata*(Chaw et al. 2014), as well as the cobweb  
337 spider *Latrodectus hesperus*(Ayoub et al. 2013). Our confidence in this sequence is high since  
338 the complete sequence was spanned entirely by multiple PacBio HiFi reads. In the repetitive  
339 region, we found 13 iterated repeats of a 357 amino acid motif, and a 14th partial repeat  
340 (**Supplemental Figure S1**). As with previous reports on the structure of AcSp(Ayoub et al.  
341 2013; Hayashi 2004; Chaw et al. 2014; Wen et al. 2018), we also found that the repeats are  
342 remarkably well-homogenized. After removal of the signal peptide between Ser-23 and Arg-24,  
343 the remaining N-terminal domain secondary structure includes 5 alpha-helices, and a C-  
344 Terminal domain consisting of 4 alpha helices which is consistent with the structure found in  
345 other AcSps(Wen et al. 2018).

346

### 347 *Pseudoflagelliform spidroin (Pflag)*

348

349 The capture spiral of an orb-web is a composite of two types of silk(Tarakanova and Buehler  
350 2012). For cribellate spiders such as *U. diversus*, the core fiber is the pseudoflagelliform silk  
351 made up of pseudoflagelliform spidroin (Pflag). When produced, this core fiber is coated with  
352 finely brushed cribellate silk which provides adhesive properties to the capture silk (see  
353 Cribellate spidroin).

354 We found a single candidate for Pflag on Chromosome 7 (**Figure 4A** and **Table 7**). We  
355 determined that the internal structure consists of 91 repeats, each of which range between 39  
356 and 70 aa in length and are composed of two parts: a glycine-poor spacer, which is usually  
357 either 7 or 12 aa, followed by a glycine-rich repeat with variations on the motif *PSSGGXGG*.  
358 The final repeat motif in each module always terminates in a proline.

359

360 *Cribellate spidroin (CrSp)*

361

362 Cribellate silk is produced by numerous silk glands with hundreds to thousands of spigots in the  
363 cribellum. These numerous fibers are combined into a single silk which is combed into a “wooly”  
364 silk by calamistra located on the posterior legs. This wooly silk soaks into the waxy cuticle of  
365 insects by means of van der Waals interactions and hygroscopic forces and is used as the  
366 capture silk by cribellate orb-weavers(Hawthorn and Opell 2003). No full-length sequence for  
367 CrSp has been reported to date, although partial spidroin sequences have been reported for  
368 some CrSps in *Tengella perfuga*(Correa-Garhwal et al. 2018) and several *Octonoba*  
369 species(Kono et al. 2020). The whole genomic length of the *CrSp* locus on Chromosome 10 is  
370 20,195 nt (**Figure 4A** and **Table 7**). The *U. diversus CrSp* gene was predicted to be a 2-exon  
371 gene, with a single 83 nt intron, which is consistent with what we found by manual inspection.  
372 While the entire *CrSp* locus was not spanned by single HiFi reads, we are still confident in the  
373 sequence produced, since no more than 2 reads were required to span the entire sequence.  
374 The N-terminal region of the predicted protein product consists of 874 aa and the C-terminal  
375 region consists of 296 aa (**Table 7**). The long N-terminal domain is consistent with that found in  
376 *Octonoba* spp, which were also found to have coding regions more than 2 kbp(Kono et al.  
377 2020). We found an internal region that consists of variations on 4 repetitive motifs, with the first  
378 half of the sequence made up of motifs 1 and 2 alone, and the second half of the sequence  
379 including all 4 motifs. Motifs 1 and 3 are similar, whereas motifs 2 and 4 are distinct from each  
380 other motif (**Supplemental Figure S1**).

381

382 *Major ampullate spidroin (MaSp)*

383

384 Draglines are produced by the major ampullate gland which produces two major ampullate  
385 spidroins (MaSp1 & MaSp2). This silk has extremely high tensile strength and elasticity and is  
386 commonly used for the primary load-bearing parts of the web such as the frame and radii. It is  
387 also the primary silk produced by spiders when they are navigating their environment(Foelix  
388 2011). We found three candidates for major ampullate spidroin (MaSp). Based on previous work  
389 that identified multiple distinct classes of MaSps, we were able to assign one of our candidate  
390 sequences to the MaSp-1 class and the other two candidates to the MaSp-2 class. All three  
391 MaSp candidates are on Chromosome 6, although the MaSp-1 locus was located distantly from  
392 the two MaSp-2 loci (**Figure 4A**).

393

394 The MaSp-1 candidate is the single spidroin sequence we were not able to call as a complete  
395 sequence. In our annotation, the sequence appears as a two-exon gene, with the 5' sequence

396 and 3' sequence found in different reading frames; however, a close inspection of the data  
397 suggests that this is not likely to be correct. We found instead that there is a large region to  
398 which the PacBio HiFi reads mapped poorly. There is consensus between the reads that  
399 indicates sequence found in the reference assembly that is not found in the reads. However, it is  
400 not clear from inspection exactly where the boundaries should be called for this region. This is  
401 likely an artifact of the assembly, since the reference was assembled from polymerase-based  
402 sequencing which is susceptible to polymerase-slippage.

403

404 The first MaSp-2 candidate, MaSp-2a, is a single exon sequence. We found that there were two  
405 distinct regions. Interestingly, the first repetitive region, which is 958 aa in length, contains  
406 mostly *GPGPQ* motifs reminiscent of the *GPGPX* motifs found in the MaSp-4 sequence recently  
407 reported in *Caerosris darwini*, but not elsewhere in the known catalog of spidroins (Garb, *et al.*,  
408 2019). The second repetitive region, which is 1,215 aa long, contains runs of poly-A and *GPX*,  
409 although *GPGPQ* repeats are also found less frequently in this region.

410

411 The second MaSp-2 candidate, MaSp-2b is also a single exon sequence. In the repetitive  
412 region, *GPGPQ* occurs in a few instances, but is relatively rare compared to MaSp-2a.  
413 Alternating runs of polyalanine and variations on the motif *GSGPGQQGPGQQGPGGYGPG*  
414 characterize the repetitive region. Unlike the case of the first MaSp-2 candidate, MaSp-2b does  
415 not have two distinct repetitive regions.

416

417 *Minor ampullate spidroin (MiSp)*

418

419 Minor ampullate silk has lower strength, but greater extensibility, and is composed of spidroin  
420 made by the minor ampullate gland. While it is commonly used for the construction of the  
421 auxiliary spiral in orb-weavers, it is used for prey wrapping by cob-weavers (Vienneau-Hathaway  
422 *et al.* 2017). We found three candidates for minor ampullate spidroin (MiSp). All three MiSp loci  
423 were located near one another on Chromosome 1 (**Figure 4A**).

424

425 The first candidate, MiSp-1 is a single exon sequence (**Table 7**). There are three repetitive  
426 regions in MiSp-1, separated by short spacers. Previous work in *Araneus ventricosus* and the  
427 cobweb weaving spiders *Latrodectus hesperus*, *L. tredecimguttatus*, *L. geometricus*, *Steatoda*  
428 *grossa*, and *Parasteatoda tepidariorum* has suggested that MiSp length and sequence are  
429 conserved (Chen *et al.* 2012; Vienneau-Hathaway *et al.* 2017); however, while the spacers we  
430 observed shared some sequence similarities, such as the presence of serine, threonine, and  
431 valine residues, the lengths of the spacers observed in *U. diversus* are much shorter.

432

433 The second and third candidates, MiSp-2a and MiSp-2b, shared a nearly identical amino acid  
434 composition, which was slightly different from that of MiSp-1. Both are single exon sequences  
435 (**Table 7**). Their hydrophobicity profiles are also slightly different from MiSp-1.

436

437 *Pyriform spidroin (PySp)*

438

439 Pyriform silk serves as an adhesive compound used to adhere silk lines to one-another, or to  
440 substrate that holds the web(Foelix 2011). We found one single exon candidate pyriform  
441 spidroin (PySp) on Chromosome 1 (**Figure 4A**), which is consistent in size with a prior PySp  
442 sequence reported from *Araneus ventricosus*(Wang et al. 2019a). We found that the internal  
443 repetitive region was preceded by a Q-rich N-linker region. 19 tandem repeat motifs, ranging  
444 from 188 - 196 aa were found.

445

446 *Tubuliform spidroin (TuSp)*

447

448 Tubuliform silk is used to encase the egg sac and is spun from tubuliform glands. We found a  
449 single candidate for tubuliform spidroin (TuSp) on Chromosome 2 (**Figure 4A** and **Table 7**)  
450 which is a single exon We found an internal region that was composed of 10 repeats, ranging  
451 from 262 aa - 302 aa in length. This is consistent with other reported TuSp repeats, which have  
452 been observed between 176 and 375 residues, although it seems that the typical TuSp module  
453 is repeated 15 to 20 times(Wen et al. 2017). The N-terminal region has 3 Cys residues: Cys-21,  
454 Cys-52, and Cys-132. Other TuSp N-terminal sequences have been reported with 2 Cys  
455 residues(Wen et al. 2017), however Cys-21 is expected to be removed during signal peptide  
456 cleavage. After cleavage, the N-terminal domain contains five predicted alpha helices. Cys-52  
457 and Cys-132 are found in alpha helix 1 and alpha helix 4 after cleavage, which is also where the  
458 AcSp Cys residues are found. This conservation suggests functionality.

459

## 460 **Whole Genome Duplication**

461

462 Gene duplication acts as a primary mode of evolutionary diversification by providing new  
463 genetic material that serves as a reservoir for subfunctionalization and neofunctionalization  
464 under selective pressure(Ohno 2013; Sémon and Wolfe 2007; Zhang 2003). In previous studies  
465 in spiders, evidence of whole genome duplication has been reported, including the presence of  
466 multiple copies of *Hox* genes(Sheffer et al. 2021; Cerca et al. 2021; Clarke et al. 2015, 2014)  
467 and the expansion of silk genes and chemosensory genes(Cerca et al. 2021). We analyzed the  
468 *U. diversus* genome to identify signatures of whole genome duplication.

469

470 Evidence for whole genome duplication can be ascribed by assessing the number of *Hox* gene  
471 clusters(Garcia-Fernández and Holland 1994). We used published *Hox* gene sequences from  
472 the spider *Parasteatoda tepidariorum* as query sequences for BLAST searches against the *U.*  
473 *diversus* genome, identifying two *Hox* gene clusters on Chromosome 5 and Chromosome 10  
474 (**Figure 4A**), which were found to retain the expected order of *Hox* genes(Pace et al. 2016).  
475 Each cluster was missing a single *Hox* gene; however, the specific missing gene was different

476 for each of the clusters. Cluster A on Chromosome 5 is missing the *fushi tarazu* (*ftz*) gene  
477 sequence, while Cluster B on Chromosome 10 is missing the *labial* gene sequence. Our  
478 findings are consistent with the discovery of two *Hox* gene clusters in *P. tepidariorum*(Schwager  
479 et al. 2017). In the genome of *T. antipodiana*, two *Hox* clusters were found(Fan et al. 2021),  
480 including one complete cluster on chromosome 12 which included a copy of all 10 expected *Hox*  
481 genes, and a second cluster on chromosome 8 which was found to be missing *abdominal-A*,  
482 *Hox3*, *ftz*, and *Ultrabithorax*.The presence of multiple *Hox* clusters in the *U. diversus* genome  
483 adds further support to an ancient, ancestral whole genome duplication.

484 We also searched for evidence of synteny between pseudochromosomes using  
485 AnchorWave(Song et al. 2022). The initial identification of syntenic blocks was quite ubiquitous  
486 across all 10 pseudochromosomes, but with large gaps between mRNAs and/or with very large  
487 interanchor distances. To constrain these results, we chose to include only mRNAs where the  
488 number of missing mRNAs between anchors was 4 or less. We made this allowance to account  
489 for the fact that we expect there to be significant loss of copies of duplicated genes(Ohno 2013;  
490 Sémon and Wolfe 2007; Hakes et al. 2007). This resulted in retaining 196 blocks of at least 2  
491 mRNAs (**Figure 5**). Considering the conservative nature of our analysis, this line of evidence  
492 provides further support for an ancient duplication event. However, considerable reorganization  
493 has occurred since the duplication event, an observation also made in mammalian genomes,  
494 and potentially associated with their successful adaptation to diverse environments(Waters et al.  
495 2021; White 1978).

496  
497  
498

## Sex Chromosomes

499 The most common and likely ancestral system of chromosomal sex determination in spiders is  
500 ♂X<sub>1</sub>X<sub>2</sub>/♀X<sub>1</sub>X<sub>1</sub>X<sub>2</sub>X<sub>2</sub>.(Sember et al. 2020) However, spiders exhibit a diversity of sex determining  
501 systems, with some including Y chromosomes, and others possessing up to 13 X  
502 chromosomes(Král et al. 2019). Usually, these sex determining systems are determined by  
503 karyotyping(Sember et al. 2020; Král et al. 2019) (**Figure 3**). The genetic basis of sex  
504 determination and chromosomal dosage compensation are unknown for spiders. Determining  
505 the genetic identity of X chromosomes has been challenging, in part due to significant levels of  
506 shared synteny between sex chromosomes and autosomes(Sember et al. 2020) (**Figure 5**), as  
507 well as a paucity of spider genomes with chromosome-level scaffolds. X chromosome scaffolds  
508 from more fragmented genomes have been identified by quantifying the relative difference in  
509 read depth from sperm with or without the X chromosomes(Bechsgaard et al. 2019). Recently,  
510 the X chromosomes for *Argiope bruennichi* (also ♂X<sub>1</sub>X<sub>2</sub>/♀X<sub>1</sub>X<sub>1</sub>X<sub>2</sub>X<sub>2</sub>) were identified through  
511 disparities in read coverage of X chromosomes between males and females(Sember et al.  
512 2020). In principle, because males have only one copy of each X chromosome, the average  
513 read depth for scaffolds from these chromosomes should be half that of autosomes. To  
514 determine the sex chromosome in *U. diversus*, we assembled an Illumina short-read library from  
515 a single male spider and mapped the reads onto the 10 assembled pseudochromosomes  
516 (**Figure 6**).

517

518 While 8 of the 10 pseudochromosomes had a median read depth of 40 ± 2, pseudochromosomes  
519 3 and 10 were outliers, with read depths of 36 and 33, respectively. If these  
520 pseudochromosomes were exclusively unique X chromosomes, the expected read depth would  
521 have been ~20. However, as observed in other species(Sember et al. 2020) and our own  
522 (**Figure 5**), orthologous autosomal regions should decrease the expected depth disparity. The  
523 higher than expected read depth could also be due to mis-assembly of these

524 pseudochromosomes, however very little linkage was observed between pseudochromosomes  
525 3 and 10 in the Hi-C data (**Figure 3**). Despite these caveats, the lower median read depth in  
526 males for pseudochromosomes 3 and 10 is a strong indicator these likely represent the two X  
527 chromosomes for *U. diversus*.

528  
529 Prior work with *Stegodyphus mimosarum* (also ♂X<sub>1</sub>X<sub>2</sub>/♀X<sub>1</sub>X<sub>1</sub>X<sub>2</sub>X<sub>2</sub>) identified sex-linked scaffolds  
530 based on lower read depth of sperm lacking X chromosomes (Bechsgaard et al. 2019). When  
531 genes identified on these X-linked *S. mimosarum* scaffolds were mapped on to the *U. diversus*  
532 pseudochromosomes (**Table 5**), 62% of these genes mapped onto pseudochromosomes 3 and  
533 10 (**Figure 6B**). This large fraction of predicted X-linked genes between two distantly related  
534 species of spiders is a strong indicator that not only are pseudochromosomes 3 and 10 likely to  
535 be the X chromosomes, but that the genetic composition of these chromosomes has remained  
536 fairly stable amongst spiders. Since two X chromosomes were recently identified in *A.*  
537 *bruennichi*, we compared the genetic composition (**Supplemental Table S6**) and synteny  
538 between the X chromosomes identified in both species (**Figure 6**). In addition to shared X-linked  
539 genes (**Supplemental Table S6, Figure 6B**), *A. bruennichi* scaffolds 10 and 9 appear to share  
540 considerable synteny with *U. diversus* pseudochromosomes 10 and 3, respectively. One of  
541 these syntenic blocks is the *Hox* gene cluster located on chromosome 10 for both species. The  
542 presence of a *hox* cluster on a sex chromosome was surprising since these genes play critical  
543 roles in development. Therefore, either dosage compensation is needed in males, or dosage  
544 disparity between males and females plays a role in developmental sexual dimorphism.

545  
546 In insects, the primary sex chromosome dosage sensor is *sex lethal* (*sxl*), which then triggers a  
547 cascade of sex-defining signaling events leading to sexually dimorphic expression of genes  
548 and/or splice variants. While no *sxl* homologue has been found in spider genomes (including *U.*  
549 *diversus*), other genes involved in sexual dimorphism, such as *doublesex* (*dsx*) are present.  
550 Thus, the mechanism spiders use for sensing X:autosome ratio differences remains unknown,  
551 but relevant genes are likely shared between *U. diversus*, *A. bruennichi*, and *S. mimosarum*. Of  
552 the 534 shared sex-linked genes in these three species, 14 are predicted to be DNA/RNA-  
553 binding, and may play a role in sex-determination. The X-linked genes shared between these  
554 three species (**Supplemental Table S6**) will be a resource for comparative analysis to identify  
555 conserved genes that serve as sex-specifying triggers for spiders. Uncovering how spiders  
556 perform sex-linked dosage compensation can not only illuminate how arthropods evolved  
557 different sex-determining systems, but also how dosage compensation has evolved  
558 independently in numerous animals.

## 559 **Conclusions**

560

561 Here, we present a high-quality chromosome-level genome and complementary transcriptome  
562 assembly of the hackled orb-weaver *Uloborus diversus*. The 2.15 Gbp draft genome assembly  
563 comprises 1,586 scaffolds, including 10 pseudochromosomes that contain 1.9 Gbp (88%) of the  
564 total assembly, comparable to the estimated genome size (1.98 Gbp) predicted by  
565 GenomeScope2 and contains the vast majority of highly conserved orthologs (94.1% complete,  
566 with 88.6% complete and in single copy) as estimated by BUSCO. We predicted a total of  
567 44,408 protein-coding gene models with a BUSCO completeness of 86.7%. Despite the  
568 aforementioned technical hurdles, the contiguity and completeness of this assembly, along with  
569 the recovery of a complete catalog of full-length spidroin gene sequences, demonstrates the  
570 utility of using multiple complementary sequencing technologies for large, repetitive, and highly  
571 heterozygous genomes.

572

573 The repetitive nature and length of spidroin genes have posed a technical challenge for  
574 identifying and reporting full-length sequences. However, it is exactly these qualities that lend  
575 spidroins their unique mechanical properties(Malay et al. 2017; Rising et al. 2005; Li et al.  
576 2017); underscoring the need for accurate assemblies. Recent studies leveraging single  
577 molecule, long read sequencing technology have predicted longer spidroin sequences than  
578 those using PCR approaches(Kono et al. 2019). Here, we used ONT and PacBio HiFi reads to  
579 achieve a complete catalog of full-length spidroin sequences for *Uloborus diversus*. The ability  
580 to recover full-length sequences for this family of genes is an indication of the high quality of the  
581 assembly.

582 All current models of chromosomal dosage compensation are based on single-sex chromosome  
583 animals, however multiple sex-chromosome systems exist in both vertebrates and  
584 invertebrates(Yoshido et al. 2020; Rens et al. 2007). Spiders exhibit considerable morphological  
585 and behavioral sexual dimorphism that is based on a multiple-sex chromosome system.  
586 Understanding the genetic underpinnings of spider sexual development will contribute to a fuller  
587 understanding of how chromosomal sex determination can evolve independently in different  
588 species. Here we provide evidence for the identities of sex chromosomes in *U. diversus* and  
589 leverage this information to identify 14 candidate DNA-binding genes that are shared between  
590 three divergent species of spiders.

591

592 Our genome will facilitate comparative studies and meets a specific need in the field for a  
593 greater representation of genomes from the UDOH+RTA clade that represent nearly half of all  
594 known spider species (**Figure 1**)(Garb et al. 2018). We expect that the highly contiguous draft  
595 genome and transcriptome datasets we produced for *U. diversus* will serve as a valuable  
596 resource for continuing research into the evolution, development, and physiology of spiders, as  
597 well as a vital tool to study the genetic basis of orb-weaving behavior. While a handful of spider  
598 genomes have been published, all orb-weaving genomes have been from ecribellate Araneid  
599 spiders, with no representative genomes from the cribellate families Uloboridae, Deinopidae,  
600 Oecobiidae, or Hersiliidae. Improved knowledge of genomes from these families, combined with  
601 behavioral and cellular analyses of orb-weaving behavior, will offer a crucial foundation for  
602 understanding how and when orb-weaving evolved.

603

604



## 605 **Materials and Methods**

606

### 607 **Sample Collection and Husbandry**

608

609 We collected spiders of the species *Uloborus diversus* from the ancestral lands of the  
610 Ramaytush, in Half Moon Bay, California, USA. We collected colony founders from a single  
611 greenhouse during several trips between 2016 and 2019 and transported them to custom-  
612 fabricated habitats in an on-campus greenhouse at Johns Hopkins University. We later  
613 transferred experimental animals from the on-site greenhouse to custom-fabricated habitats in  
614 the laboratory until required for experiments. We fed all animals alternately *Drosophila*  
615 *melanogaster* or *Drosophila virilis* once per week.

616

### 617 **Karyotyping**

618 We soaked embryos soaked in Grace's insect medium (Gibco) containing 0.1% colchicine for 2  
619 hours. We then added an equal volume of hypotonic solution. After 15 min, we transferred the  
620 embryos to a 3:1 ethanol:acetic acid solution for 1 hour. After fixing, we transferred embryos to  
621 gelatin-coated microscope slides and dissociated them in a drop of 45% acetic acid. We used  
622 siliconized coverslips to squash the dissociated tissue and briefly froze them in liquid nitrogen.  
623 After removing the slides from LN2, we immediately removed the coverslips with a razor blade  
624 and transferred the slides as quickly as possible to 95% ethanol. We then performed a step-  
625 down series from 95% ethanol to 70%, 35%, and finally to Grace's insect medium to return the  
626 tissue to an aqueous solution. We then transferred the slides to a 1ug/mL DAPI solution. After a  
627 10-minute incubation, we transferred the slides to de-ionized water to rinse and mounted  
628 coverslips with a drop of Vectamount (Vector Laboratories, Burlingame, CA, USA).

629

### 630 **RNA Extraction, Library Preparation, and Sequencing**

631

632 We extracted total RNA from multiple samples: a whole adult female, a whole adult male, adult  
633 female prosoma and opisthosoma, adult male prosoma and opisthosoma, pooled legs from both  
634 the adult female and adult male dissections, a 4th instar female, and approximately 30 pooled  
635 2nd instars. We used the Qiagen RNeasy Mini Kit (Qiagen, Hilden, Germany) to extract total  
636 RNA, following the manufacturer's protocol. We estimated the quality and quantity of total RNA  
637 using a NanoDrop One Microvolume UV-Vis Spectrophotometer (ThermoFisher Scientific,  
638 Waltham, MA, USA). Before library preparation, we also measured the quality, quantity, and  
639 fragment length of our total RNA using a TapeStation 4200 System with RNA ScreenTape and  
640 reagents (Agilent, Santa Clara, CA, USA). We prepared barcoded, directional, paired-end RNA-  
641 seq libraries with the NEBNext Ultra II Directional RNA Library Prep Kit for Illumina using the  
642 NEBNext Poly(A) mRNA Magnetic Isolation Module. We submitted the resulting libraries to the  
643 Johns Hopkins Genomics Core Resources Facility to be sequenced on an Illumina HiSeq 2500  
644 Sequencing System with 150 bp paired-end chemistry.

645

## 646 **Genomic DNA Extraction, Library Preparation, and Sequencing**

647

648 Prior to extraction of DNA, we withdrew food for 3 days to minimize the potential contribution of  
649 contaminating DNA from dietary sources. We extracted high molecular weight (HMW) DNA  
650 using the QIAgen MagAttract HMW DNA kit. Prior to HMW purification, we followed the  
651 manufacturer's protocol for disruption/lysis of tissue. We avoided fast pipetting and prolonged  
652 vortexing to minimize shearing of DNA. We flash froze adult spiders in liquid N<sub>2</sub> and crushed  
653 them with a pellet pestle (Fisher, 12-141-364) in a Protein LoBind tube (Eppendorf, 022431081)  
654 containing 220 uL of Buffer ATL. We then added 20 uL Proteinase K and briefly vortexed the  
655 sample. We next incubated the sample overnight at 56C with 900 rpm shaking on a  
656 ThermoMixer C (Eppendorf, 5382000023). After the overnight incubation, we then briefly  
657 centrifuged the sample to spin down condensate on the tube. We next transferred 200 uL of  
658 lysate to a fresh 2 mL sample tube and followed the manufacturer's protocol for manual  
659 purification of HMW DNA from fresh or frozen tissue. We estimated DNA quality using a  
660 NanoDrop One Microvolume UV-Vis Spectrophotometer and quantified DNA using a Qubit 4  
661 Fluorometer (ThermoFisher) with a Quant-iT dsDNA HS Assay Kit. We also measured DNA  
662 quality, quantity, and fragment length distributions using the Agilent TapeStation 4200 System  
663 with Genomic DNA ScreenTape and reagents before proceeding to library preparation. A typical  
664 preparation from a 20 mg spider yielded 8.5ug of DNA.

665

### 666 *Illumina Sequencing*

667

668 For Illumina sequencing, we extracted genomic DNA from a single, whole, unmated penultimate  
669 stage female to minimize the potential contribution of extraneous haplotypes from stored sperm  
670 after mating events. We submitted the HMW gDNA to the Johns Hopkins GCRF, where they  
671 prepared a PCR-free library of approximately 400 bp DNA insert size using the Illumina TruSeq  
672 PCR-Free High Throughput Library Prep Kit (San Diego, CA, USA), according to the  
673 manufacturer's protocol. They then sequenced the prepared library on an Illumina NovaSeq  
674 6000 Sequencing System with 150bp paired-end chemistry.

675

### 676 *ONT Sequencing*

677

678 For ONT sequencing, we extracted HMW genomic DNA from 3 adult females. We prepared  
679 sequencing libraries using the Ligation Sequencing Kit (SQK-LSK109) (Oxford Nanopore  
680 Technologies, UK), according to the manufacturer's protocols. Third party reagents we used  
681 during library preparation included: New England Biolabs (New England Biolabs, Ipswich, MA,  
682 USA) NEBNext End Repair/dA-Tailing Module (E7546), NEBNext FFPE DNA Repair Mix  
683 (M6630), and NEB Quick Ligation Module (E6056). We then sequenced the libraries, using ONT  
684 R.9.4.1 flowcells (FLO-PRO002) on an ONT PromethION sequencing platform. We then used

685 ONT's Albacore basecalling software v.2.0.1 (RRID:SCR\_015897) to basecall the raw fast5  
686 data.

687

### 688 *PacBio HiFi Sequencing*

689

690 For PacBio sequencing, HMW DNA was extracted from a single adult female spider provided to  
691 Circulomics (Baltimore, MD, USA). They extracted DNA using a modified protocol with the  
692 Nanobind Tissue Kit (Circulomics, #NB-900-701-01). Briefly, they froze and crushed a single,  
693 adult female spider with a pellet pestle (Fisher, #12-141-364) in a Protein LoBind tube  
694 (Eppendorf, #022431081) containing 200  $\mu$ L of Buffer CT. The crushed spider was centrifuged  
695 at 16,000  $\times$  g at 4 C for 2 min. The supernatant was discarded, and the pellet was resuspended  
696 in 500  $\mu$ L Buffer CT and the mixture was transferred to a 2.0 mL Protein LoBind tube (Eppendorf  
697 # 022431102). The suspension was spun again at 16,000  $\times$  g at 4 C for 2 min and the  
698 supernatant discarded. The spider tissue pellet was combined with 20  $\mu$ L Proteinase K and 150  
699  $\mu$ L Buffer PL1 and resuspended by pipetting with a P200 wide bore pipette tip. The tissue was  
700 incubated on a ThermoMixer at 55 C with 900 rpm mixing for 1 hour. After lysis, 20  $\mu$ L RNaseA  
701 was added, and the lysate was mixed by pipetting with a P200 wide bore pipette tip. The lysate  
702 was incubated at RT for 3 min. After RNaseA incubation, 25  $\mu$ L Buffer SB was added, the lysate  
703 was vortexed 5  $\times$  1 sec pulses, and then centrifuged at 16,000  $\times$  g at 4 C for 5 min. The  
704 supernatant (~200  $\mu$ L) was transferred to a 70 $\mu$ M filter (Fisher # NC1444112) set in a new 1.5  
705 mL Protein LoBind tube (Eppendorf # 022431081). The tube with the 70  $\mu$ M filter was spun on a  
706 mini-centrifuge (Ohaus # FC5306) for 1 sec and then the filter was discarded. 50  $\mu$ L Buffer BL3  
707 was added to the cleared lysate and the tube was inversion mixed 10X. The tube was then  
708 incubated on a ThermoMixer at 55 C with 900 rpm mixing for 5 min. After incubation, the tube  
709 was allowed to come to RT, which took about 2 min. The tube was spun for 1 sec on a mini-  
710 centrifuge to spin down condensate from the lid. One 5 mm Nanobind disk was added to the  
711 tube followed by 250  $\mu$ L isopropanol and then the tube was inversion mixed 5X. The tube was  
712 then rocked on a platform rocker (ThermoScientific # M48725Q) at RT and max speed for 30  
713 min. The DNA-bound Nanobind disk was washed according to handbook directions with one  
714 500  $\mu$ L CW1 wash and one 500  $\mu$ L CW2 wash. The tube with the disk was tap spun for 2  $\times$  1 sec  
715 to dry the disk. The DNA was eluted with 50  $\mu$ L Buffer EB and incubated at RT overnight. The  
716 next day, the eluate was pipette mixed with a standard bore pipette tip 5x and then quantitated  
717 with Nanodrop and Qubit dsDNA BR assay and then sized by pulsed-field gel electrophoresis.

718

719 We then submitted the DNA sample to the University of Maryland School of Medicine Genomics  
720 Core Facility for PacBio HiFi sequencing. There, they size selected the DNA using a Safe  
721 Science BluePippin with a 9kb high-pass cutoff. They prepared the sequencing library using the  
722 Express v2 kit, according to the standard protocol for preparing HiFi sequencing libraries. They  
723 then sequenced the library on a PacBio Sequel II 8M SMRT Cell using a 30 hour HiFi run mode  
724 and processed using SMRT Link v.9.0 software.

725

### 726 *Dovetail Chicago and Dovetail Hi-C Sequencing*

727

728 To further improve the *U. diversus* genome assembly, we used proximity ligation-based  
729 sequencing techniques to scaffold intermediate versions of our assembly. We provided 19  
730 spider specimens to Dovetail Genomics (Scotts Valley, CA, USA) for Chicago and Hi-C library  
731 preparation as previously described (Putnam et al. 2016). They prepared a Chicago library using  
732 15 pooled adult females and a Hi-C library using 4 pooled adult females. They sequenced both  
733 the prepared Chicago and Dovetail Hi-C libraries on an Illumina HiSeq X sequencing platform  
734 on 1 flowcell.

735

### 736 **DNA-seq and RNA-seq QA/QC**

737

738 For Illumina, we examined read quality using FastQC (Andrews 2010) v.0.11.9  
739 (RRID:SCR\_014583). For DNA-seq data, we determined that, due to high quality of reads and  
740 absence of adapter sequences, no further processing would be required and proceeded to  
741 assembly with raw read data. For RNA-seq data, we used TrimGalore (Krueger et al. 2021)  
742 v.0.4.2 (RRID:SCR\_011847) to apply quality filtering and remove adapter sequences from the  
743 FASTQ files. We performed additional filtering for quality with Trimmomatic (Bolger et al. 2014)  
744 v.0.33 (RRID:SCR\_011848). For ONT, reads shorter than 3 kbp were discarded. The length-  
745 filtered ONT long reads were used in downstream assembly.

746

### 747 **Genome Size, Heterozygosity, and Unique Sequence Estimation**

748

749 Prior to assembly, we used Jellyfish (Marçais and Kingsford 2011) v.2.2.4 (RRID:SCR\_005491)  
750 to count the frequency of canonical 21-mers in our Illumina sequencing data. We used the  
751 resulting sorted *k*-mer frequencies vs counts histogram as input to GenomeScope (Ranallo-  
752 Benavidez et al. 2020; Vurture et al. 2017) v.2.0 to estimate genome size, heterozygosity, and  
753 repetitiveness.

754

### 755 **Recovery of Mitogenome**

756

757 We used Novoplasty (Dierckxsens et al. 2016) v.4.2 (RRID:SCR\_017335) to generate a  
758 complete circularized mitochondrial sequence using raw Illumina read data. The mitochondrial  
759 sequences of several spider species were used to provide seed sequences (**Supplemental**  
760 **Table S3**). The resulting mitogenome sequences assembled by Novoplasty were compared for  
761 consensus. The consensus mitogenome was uploaded to the MITOS 2 web server (Bernt et al.  
762 2013) for annotation. The CGView web server (Stothard and Wishart 2005)  
763 (RRID:SCR\_011779) was used to visualize the annotated mitogenome.

764

765 **Nuclear Genome Assembly**

766

767 *De novo Nuclear Genome Assembly with MaSuRCA*

768

769 Illumina reads were assembled into contigs and the resulting contigs were scaffolded with ONT  
770 long reads using the MaSuRCA assembly pipeline(Zimin et al. 2013, 2017) v.3.4.2  
771 (RRI:010691). We used default settings, including the default CABOG contigging module in lieu  
772 of the Flye assembler. The resulting genome assembly is referred to as *U. diversus* v.1.0.

773

774 To improve the assembly, we used *Rascaf*(Song et al. 2016) v.2016-11-29 to scaffold with  
775 Illumina RNA-seq read data. The resulting genome assembly is referred to as *U. diversus* v.1.1.  
776 To reduce redundancy in the assembly due to the presence of alternative haplotigs, we used  
777 Pseudohaploid with default settings. The resulting genome assembly is referred to as *U.*  
778 *diversus* v.1.2

779

780 *De novo Nuclear Genome Assembly with PB-IPA*

781

782 We used PacBio's Improved Phased Assembly (IPA) HiFi Genome Assembler with default  
783 settings, specifying a genome size of 1.9 Gbp, to assemble the HiFi reads. The resulting  
784 genome assembly is referred to as *U. diversus* v.2.0.

785

786 *Merging MaSuRCA and PB-IPA Assemblies with SAMBA*

787

788 We used the SAMBA tool distributed with MaSuRCA to merge the MaSuRCA assembly, *U.*  
789 *diversus* v.1.2, and the PB-IPA assembly, *U. diversus* v.2.0. The resulting genome assembly is  
790 referred to as *U. diversus* v.3.0.

791

792 **Scaffolding Assemblies with HiRise**

793

794 The initial *U. diversus* v.1.2 draft assembly obtained using a combination of MaSuRCA, *Rascaf*,  
795 and Pseudohaploid was provided to Dovetail Genomics in FASTA format. The resulting genome  
796 assembly is referred to as *U. diversus* v.1.3.

797 The merged MaSuRCA and PB-IPA assembly, *U. diversus* v.3.0, was provided to Dovetail  
798 Genomics in FASTA format. The resulting genome assembly is referred to as *U. diversus* v.3.1.

799

## 800 **Genome Assembly Metrics and Assessments**

801

802 For each assembly, completeness was estimated with Benchmarking Universal Single-Copy  
803 Orthologs (BUSCO)(Seppey et al. 2019; Simão et al. 2015; Waterhouse et al. 2018) v.5.2.1  
804 (RRID:SCR\_015008) using the arachnida\_odb10 database(Kriventseva et al. 2019). Contiguity  
805 of each assembly was evaluated for comparison using Quast(Gurevich et al. 2013) v.5.0.2  
806 (RRID:SCR\_001228).

807

## 808 **Genome-Guided Transcriptome Assembly**

809

810 Cleaned and trimmed Illumina RNA-seq reads were aligned to the genome using *HISAT2*(Kim  
811 et al. 2019) v.2.2.1. We then used the Trinity assembler<sup>43</sup> v.2.12.0 to produce a genome-guided  
812 transcriptome assembly [--CPU 60 --max\_memory 200G --genome\_guided\_max\_intron 20000 --  
813 SS\_lib\_type RF --include\_supertranscripts --verbose]. We used TransDecoder(Haas et al.  
814 2013) v.5.5.0 with default settings, including homology searches using both BlastP(Altschul et  
815 al. 1990; Altschul 1997) against a SwissProt UniProt database(The UniProt Consortium 2019)  
816 as well as the Pfam database(Mistry et al. 2021) v.32, as ORF retention criteria.

817

## 818 **Repeat Annotations**

819

820 To characterize the repeat elements in the *U. diversus* genome, we generated a custom *de*  
821 *novo* repeat library using RepeatModeler(Flynn et al. 2020) v.2.0.2 with default parameters. We  
822 used RepeatMasker(Tarailo-Graovac and Chen 2009) v.4.1.2 to screen and mask repeat and  
823 low-complexity regions of the genome with the Dfam consensus(Storer et al. 2021) v.3.4 and  
824 RepBase RepeatMasker Edition(Bao et al. 2015) v.2018-10-26 repeat libraries.

825

## 826 **Annotation of Protein Coding Genes**

827

828 We performed gene annotation using the BRAKER 2 pipeline(Hoff et al. 2016; Bruna et al.  
829 2021; Lomsadze 2005; Lomsadze et al. 2014; Stanke et al. 2006, 2008; Gotoh 2008; Li et al.  
830 2009; Barnett et al. 2011; Iwata and Gotoh 2012; Buchfink et al. 2015; Hoff et al. 2019; Bruna et  
831 al. 2020) v.2.1.6 with RNA-seq evidence and protein homology evidence based on a custom  
832 library of spider sequences obtained from NCBI. BRAKER2 uses RNA-seq data to produce  
833 intron hints for training the *ab initio* gene prediction program AUGUSTUS(Stanke et al. 2006,  
834 2008) on a species-specific model. This species-specific model is then used in conjunction with  
835 RNA-seq data to predict protein coding genes. The bam file previously generated in  
836 transcriptome assembly and analysis was passed to BRAKER2, which was run with default  
837 settings.

838

## 839 **Annotation of Non-Coding RNAs**

840

841 We used tRNAscan-SE(Chan and Lowe 2019; Chan et al. 2021) v.2.0.7 with default settings to  
842 predict tRNAs. We then used Barrnap(Seeman 2018) v.0.9 (RRID:SCR\_015995) with default  
843 settings to predict rRNAs.

844

## 845 **Functional Annotation**

846

847 We started the annotation of predicted genes used the BLAST+ blastp algorithm. First, we  
848 obtained the longest coding sequence for each gene predicted by BRAKER2. We then used the  
849 EMBOSS(Rice et al. 2000) v.6.6.0.0 Transeq tool to translate and trim the coding sequences.  
850 Once translated and trimmed, we used the BLAST+ v.2.10.1+ Blastp tool to search against the  
851 UniProt SwissProt database with an e-value cutoff of 1e-10. We used InterProScan(Jones et al.  
852 2014; Quevillon et al. 2005) (RRID:SCR\_005829) to predict motifs, domains, and gene ontology  
853 (GO)(Ashburner et al. 2000; The Gene Ontology Consortium et al. 2021) terms  
854 (RRID:SCR\_002811), as well as MetaCyc(Caspi et al. 2016, 2018) and Reactome(Gillespie et  
855 al. 2022; Jassal et al. 2019) pathways,using the following analyses: CDD(Lu et al. 2020) v.3.18,  
856 Coils v.2.2.1, Gene3D(Lewis et al. 2018) v.4.3.0, Hamap(Pedruzzi et al. 2015) v.2020-05,  
857 MobiDBLite(Necci et al. 2017) v.2.0, PANTHER(Mi et al. 2019) v.15.0, Pfam(Mistry et al. 2021)  
858 v.34.0, PIRSF(Wu 2004) v.3.10, PIRSR(Chen et al. 2019a) v.2021-02, PRINTS(Attwood 2003)  
859 v.42.0, ProSitePatterns(Sigrist 2002; Sigrist et al. 2012) v.2021-01, ProSiteProfiles(Sigrist 2002;  
860 Sigrist et al. 2012) v.2021-01, SFLD(Akiva et al. 2014) v.4, SMART(Letunic and Bork 2018;  
861 Letunic et al. 2021) v.7.1, SUPERFAMILY(Pandurangan et al. 2019; Gough et al. 2001) v.1.75,  
862 and TIGRFAM(Haft et al. 2012; Selengut et al. 2007; Haft 2003, 2001) v.15.0.

863

## 864 **Spidroins**

865

### 866 *Identification of Spidroin Candidate Sequences*

867

868 We identified *Uloborus diversus* by conducting BLAST(Altschul et al. 1990; Altschul 1997)  
869 searches using the list of spidroin sequences included in **Supplemental Table S5** as queries  
870 against the assembled genome, transcriptome, and gene models predicted by BRAKER2. We  
871 looked for matches to both N- and C-terminal sequences from members of each type of  
872 spidroin, as well as to available repetitive motifs. After cross-referencing genomic coordinates  
873 with gene models and transcripts, we used JBrowse(Buels et al. 2016) to visualize mapping of  
874 Illumina RNAseq data and PacBio HiFi reads to the assembled genome. RNAseq reads were  
875 mapped to the genome with HISAT2(Kim et al. 2019), while minimap2(Li 2018, 2021) was used  
876 to map PacBio HiFi reads. Samtools(Li et al. 2009) was used to convert the resulting SAM files  
877 to BAM files, as well as to sort and index the BAM files. For each spidroin candidate, the entire  
878 sequence from start codon to stop codon, ignoring any predicted splicing, with an additional 5

879 kb of sequence on both the 5' and 3' end, was translated in all six frames using the ExPASy  
880 Translate Tool via the ExPASy web server(Gasteiger 2003) and inspected for ORFs as well as  
881 the presence of repetitive motifs characteristic of spidroins. Predicted splice sites were  
882 compared with RNAseq data. Unsupported splice sites, either by lack of evidence in the  
883 mapping of RNAseq reads or by the obvious presence of spidroin repeat motifs within the  
884 predicted intronic region, were removed from the annotations. Spidroins sequences were called  
885 based upon the preponderance of available evidence, which in some cases conflicted with the  
886 structure predicted by BRAKER2.

887

### 888 *Spidroin Sequence Analysis*

889

890 We used the ExPASy web server tool ProtScale to find the amino acid composition of each  
891 sequence, as well as to estimate the hydrophobicity using the the Kyte-Doolittle method(Kyte  
892 and Doolittle 1982; Gasteiger 2003). We used the PSIPRED v.4.0 tool in the UCL Bioinformatics  
893 Group's PSIPRED Protein Analysis Workbench(Buchan et al. 2013) to predict the secondary  
894 structure of each sequence. The sequences were often too long and necessitated judicious  
895 segmentation into reasonable sequences that were short enough for analysis. In such cases,  
896 we selected natural breaks in the sequence structure, such as separating the N-terminal region  
897 from the repetitive regions, etc. We used SignalP(Teufel et al. 2022) v.6.0 to predict the  
898 presence signal peptides and signal peptidase cleavage sites in the N-terminal regions.

899

### 900 **Data Availability**

901

902 The raw sequencing data and assembled genome presented in this study have been submitted  
903 to the NCBI BioProject database (<https://www.ncbi.nlm.nih.gov/bioproject/>) under accession  
904 number PRNA846873.



905 **Conflicts of Interest**

906 The authors declare no conflicts of interest.

907

908 **Funding**

909 J.M. acknowledges funding from the NSF Graduate Research Fellowship Program (DGE-  
910 1746891). A.G. acknowledges funding from NIH (R35GM124883). A.V.Z. acknowledges funding  
911 from the USDA National Institute of Food and Agriculture (2018-67015-28199), NSF (IOS-  
912 1744309), and NIH (R01-HG006677 and R35-GM130151).

913

914 **Author Contributions**

915 J.M., A.Z. and A.G. designed the research study. J.M. performed DNA purification and sample  
916 preparation for Illumina and Oxford Nanopore sequencing. J.M. performed all computational  
917 analyses, except for HiRise scaffolding (performed by Dovetail), MaSuRCA and SAMBA. A.Z.  
918 performed MaSuRCA assembly and merging with SAMBA. J.M. and A.G. analyzed the data and  
919 wrote the paper.

920

921 **Acknowledgements**

922 We thank Circulomics Inc., particularly Kelvin Liu and Michelle Kim, for assistance in DNA  
923 extraction for PacBio HiFi sequencing. We thank the Johns Hopkins University Genomics Core,  
924 and David Mohr in particular, for Illumina sequencing and consultation. We additionally thank  
925 the University of Maryland Genomic Resource Center, and Luke Tallon specifically, for PacBio  
926 HiFi sequencing. We thank Dovetail Genomics, particularly Mark Daly and Tom Swale, for  
927 Chicago and Dovetail Hi-C library preparation and sequencing, as well as HiRise assembly  
928 scaffolding and consultation. We thank the members of the Timp Lab, in particular Winston  
929 Timp, Norah Sadowski, and Rachael Workman, for training and graciously permitting the use of  
930 their ONT PromethION and TapeStation. We thank Gordus lab members, James Taylor,  
931 Michael Schatz, Bob Johnston, Rajiv McCoy, Prashant Sharma, and Ben Matthews for helpful  
932 discussions and comments on the manuscript.

933

## 934 **Figure Legends**

935

### 936 **Figure 1: Spider Phylogeny**

937 A) A female *U. diversus*.

938 B) Phylogeny of spiders. Orb weaver families are highlighted in orange. Species with  
939 sequenced genomes are highlighted in blue. *U. diversus* is highlighted in red. Example  
940 webs from Rooney(Roberson et al. 2016), Glatz(Glatz 1967), Coddington(Coddington  
941 1986). UDOH = Uloboridae, Deinopidae, Oecobiidae, Hersiliidae. RTA = Retrolateral  
942 tibial apophysis clade. O = Ordovician, S = Silurian, D = Devonian, C = Carboniferous, P  
943 = Permian, T = Triassic, J = Jurassic, K = Cretaceous, Pg. = Paleogene, Ng. = Neogene,  
944 Mya = millions of years ago

945

### 946 **Figure 2: GenomeScope Plot from Illumina Data**

947 A) Kmer spectra for Illumina reads from a single, virgin female. The diploid and haploid  
948 peaks are at 70x and 35x coverage, respectively.

949

### 950 **Figure 3: Chromosome Scale Genome Assembly**

951 A) Karyotype of female and male embryos. Female and male diploid sizes of 20 and 18,  
952 respectively, indicate a  $\text{♂X1X2/♀X1X1X2X2}$  sex-determination system, with 8  
953 autosomes.

954 B) Hi-C linkage map of assembled scaffolds. The 10 largest scaffolds are annotated.

955 C) Comparison of HiRise and MaSuRCA assemblies. The majority of the HiRise  
956 assembly is captured by the first 10 scaffolds.

957 D) Circos plot of 10 largest nuclear scaffolds, highlighting GC content, repeat content, and  
958 gene content across the scaffolds.

959 E) Circos plot of mitochondrial scaffold, highlighting tRNA-coding loci, protein-coding loci, and GC  
960 content.

961

### 962 **Figure 4: Gene Annotations**

963 A) Gene loci for spidroins and *hox* gene clusters.

964 B) Domain composition of identified spidroins. (Repeat region annotations are condensed  
965 for clarity.)

966

### 967 **Figure 5: Synteny and Chromosomal Rearrangements**

968 A) Inter-anchor mRNA ID difference distribution of syntenic blocks identified by  
969 AnchorWave analysis. Each syntenic block is defined by ORF or inter-ORF anchors. All  
970 ORFS are numerically annotated in consecutive order from scaffold 1 through scaffold  
971 10. Inter-anchor mRNA ID difference is defined as the difference in these numerical

- 972 ORF IDs between consecutive ORF anchors. If the distance equals 1, it means the two  
973 anchors are consecutive ORFs within the block. Asterisk indicates syntenic blocks used  
974 in **E**.
- 975 **B)** Inter-anchor Mbp difference distribution of syntenic blocks identified with AnchorWave  
976 analysis. Inter-anchor difference was calculated as the base-pair distance between  
977 consecutive ORF anchors within a syntenic block. Asterisk indicates syntenic blocks  
978 used in **E**.
- 979 **C)** Ribbon plot of all AnchorWave-defined syntenic blocks shared between chromosomal  
980 scaffolds.
- 981 **D)** Ribbon plot of filtered AnchorWave-defined syntenic blocks shared between chromosomal  
982 scaffolds. Only blocks consisting of consecutive ORF anchors < 4 mRNA IDs apart are  
983 plotted.

984

985 **Figure 6: Sex Chromosomes**

- 986 **A)** Read depth of Illumina reads from a male spider aligned to the chromosomal scaffolds.  
987 Scaffolds 3 and 10 (asterisks) exhibited lower read depth than other scaffolds.
- 988 **B)** Venn diagram of shared sex-associated genes identified in *U. diversus*, *S. mimosarum*,  
989 and *A. bruennichi*.
- 990 **C)** Ribbon plot of shared synteny between predicted X chromosomes from *U. diversus* and  
991 *A. bruennichi*.

992

993 **Table 1 - Summary of Library Statistics.**

994 **Table 2 - Summary of Genome Assembly Statistics.**

995 **Table 3 - Summary of Genome Assembly BUSCO Scores.**

996 **Table 4 - Summary of Repeat Content.**

997 **Table 5 - Summary of Annotation Statistics.**

998 **Table 6 - Summary of InterproScan Results.**

999 **Table 7 - Summary of Spidroin Gene Features.**

1000 **Table S1 - Comparison of Genome Statistics for Published Genomes.**

1001 **Table S2 - Summary of Spider Genome Repeat Content.**

1002 **Table S3 – Library of Annotated Genes from Spider Genomes.**

1003 **Table S4 - Mitogenome Sequences Used for NOVOplasty Seeds.**

1004 **Table S5 - Spidroin Protein Sequences Used in BLAST Searches.**

1005 **Table S6 - Summary of Common Sex-Linked Annotations.**

1006

1007

1008 **Literature Cited**

1009

1010 Akiva E, Brown S, Almonacid DE, Barber AE, Custer AF, Hicks MA, Huang CC, Lauck F,  
1011 Mashiyama ST, Meng EC, et al. 2014. The Structure–Function Linkage Database. *Nucl*  
1012 *Acids Res* **42**: D521–D530.

1013 Altschul S. 1997. Gapped BLAST and PSI-BLAST: a new generation of protein database search  
1014 programs. *Nucleic Acids Research* **25**: 3389–3402.

1015 Altschul SF, Gish W, Miller W, Myers EW, Lipman DJ. 1990. Basic local alignment search tool.  
1016 *Journal of Molecular Biology* **215**: 403–410.

1017 Andrews S. 2010. FastQC: A quality control tool for high throughput sequencing.  
1018 <http://www.bioinformatics.babraham.ac.uk/projects/fastqc/>.

1019 Ashburner M, Ball CA, Blake JA, Botstein D, Butler H, Cherry JM, Davis AP, Dolinski K, Dwight  
1020 SS, Eppig JT, et al. 2000. Gene Ontology: tool for the unification of biology. *Nat Genet*  
1021 **25**: 25–29.

1022 Attwood TK. 2003. PRINTS and its automatic supplement, prePRINTS. *Nucleic Acids Research*  
1023 **31**: 400–402.

1024 Ayoub NA, Garb JE, Kuelbs A, Hayashi CY. 2013. Ancient Properties of Spider Silks Revealed  
1025 by the Complete Gene Sequence of the Prey-Wrapping Silk Protein (AcSp1). *Molecular*  
1026 *Biology and Evolution* **30**: 589–601.

1027 Ayoub NA, Hayashi CY. 2008. Multiple Recombining Loci Encode MaSp1, the Primary  
1028 Constituent of Dragline Silk, in Widow Spiders (*Latrodectus*: Theridiidae). *Molecular*  
1029 *Biology and Evolution* **25**: 277–286.

1030 Babb PL, Lahens NF, Correa-Garhwal SM, Nicholson DN, Kim EJ, Hogenesch JB, Kuntner M,  
1031 Higgins L, Hayashi CY, Agnarsson I, et al. 2017. The *Nephila clavipes* genome  
1032 highlights the diversity of spider silk genes and their complex expression. *Nat Genet* **49**:  
1033 895–903.

1034 Bao W, Kojima KK, Kohany O. 2015. Repbase Update, a database of repetitive elements in  
1035 eukaryotic genomes. *Mobile DNA* **6**: 11.

1036 Barnett DW, Garrison EK, Quinlan AR, Stromberg MP, Marth GT. 2011. BamTools: a C++ API  
1037 and toolkit for analyzing and managing BAM files. *Bioinformatics* **27**: 1691–1692.

1038 Bechsgaard J, Schou MF, Vanthournout B, Hendrickx F, Knudsen B, Settepani V, Schierup MH,  
1039 Bilde T. 2019. Evidence for Faster X Chromosome Evolution in Spiders ed. A.  
1040 Larracuente. *Molecular Biology and Evolution* **36**: 1281–1293.

1041 Bernt M, Donath A, Jühling F, Externbrink F, Florentz C, Fritsch G, Pütz J, Middendorf M,  
1042 Stadler PF. 2013. MITOS: Improved de novo metazoan mitochondrial genome  
1043 annotation. *Molecular Phylogenetics and Evolution* **69**: 313–319.

- 1044 Blackledge TA, Hayashi CY. 2006. Unraveling the mechanical properties of composite silk  
1045 threads spun by cribellate orb-weaving spiders. *Journal of Experimental Biology* **209**:  
1046 3131–3140.
- 1047 Blackledge TA, Scharff N, Coddington JA, Szüts T, Wenzel JW, Hayashi CY, Agnarsson I.  
1048 2009. Reconstructing web evolution and spider diversification in the molecular era. *Proc*  
1049 *Natl Acad Sci USA* **106**: 5229–5234.
- 1050 Bolger AM, Lohse M, Usadel B. 2014. Trimmomatic: a flexible trimmer for Illumina sequence  
1051 data. *Bioinformatics* **30**: 2114–2120.
- 1052 Boore JL. 1999. Animal mitochondrial genomes. *Nucleic Acids Research* **27**: 1767–1780.
- 1053 Brúna T, Hoff KJ, Lomsadze A, Stanke M, Borodovsky M. 2021. BRAKER2: automatic  
1054 eukaryotic genome annotation with GeneMark-EP+ and AUGUSTUS supported by a  
1055 protein database. *NAR Genomics and Bioinformatics* **3**: lqaa108.
- 1056 Brúna T, Lomsadze A, Borodovsky M. 2020. GeneMark-EP+: eukaryotic gene prediction with  
1057 self-training in the space of genes and proteins. *NAR Genomics and Bioinformatics* **2**:  
1058 lqaa026.
- 1059 Buchan DWA, Minneci F, Nugent TCO, Bryson K, Jones DT. 2013. Scalable web services for  
1060 the PSIPRED Protein Analysis Workbench. *Nucleic Acids Research* **41**: W349–W357.
- 1061 Buchfink B, Xie C, Huson DH. 2015. Fast and sensitive protein alignment using DIAMOND. *Nat*  
1062 *Methods* **12**: 59–60.
- 1063 Buels R, Yao E, Diesh CM, Hayes RD, Munoz-Torres M, Helt G, Goodstein DM, Elsik CG,  
1064 Lewis SE, Stein L, et al. 2016. JBrowse: a dynamic web platform for genome  
1065 visualization and analysis. *Genome Biol* **17**: 66.
- 1066 Caspi R, Billington R, Ferrer L, Foerster H, Fulcher CA, Keseler IM, Kothari A, Krummenacker  
1067 M, Latendresse M, Mueller LA, et al. 2016. The MetaCyc database of metabolic  
1068 pathways and enzymes and the BioCyc collection of pathway/genome databases.  
1069 *Nucleic Acids Res* **44**: D471–D480.
- 1070 Caspi R, Billington R, Fulcher CA, Keseler IM, Kothari A, Krummenacker M, Latendresse M,  
1071 Midford PE, Ong Q, Ong WK, et al. 2018. The MetaCyc database of metabolic pathways  
1072 and enzymes. *Nucleic Acids Research* **46**: D633–D639.
- 1073 Cerca J, Armstrong EE, Vizueta J, Fernández R, Dimitrov D, Petersen B, Prost S, Rozas J,  
1074 Petrov D, Gillespie RG. 2021. The *Tetragnatha kauaiensis* Genome Sheds Light on the  
1075 Origins of Genomic Novelty in Spiders ed. T. Gossmann. *Genome Biology and Evolution*  
1076 **13**: evab262.
- 1077 Chan PP, Lin BY, Mak AJ, Lowe TM. 2021. tRNAscan-SE 2.0: improved detection and  
1078 functional classification of transfer RNA genes. *Nucleic Acids Research* **49**: 9077–9096.
- 1079 Chan PP, Lowe TM. 2019. tRNAscan-SE: Searching for tRNA Genes in Genomic Sequences.  
1080 In *Gene Prediction* (ed. M. Kollmar), Vol. 1962 of *Methods in Molecular Biology*, pp. 1–

- 1081 14, Springer New York, New York, NY [http://link.springer.com/10.1007/978-1-4939-](http://link.springer.com/10.1007/978-1-4939-9173-0_1)  
1082 9173-0\_1 (Accessed March 8, 2022).
- 1083 Chaw R, Zhao Y, Wei J, Ayoub NA, Allen R, Atrushi K, Hayashi CY. 2014. Intragenic  
1084 homogenization and multiple copies of prey-wrapping silk genes in Argiope garden  
1085 spiders. *BMC Evol Biol* **14**: 31.
- 1086 Chen C, Wang Q, Huang H, Vinayaka CR, Garavelli JS, Arighi CN, Natale DA, Wu CH. 2019a.  
1087 PIRSitePredict for protein functional site prediction using position-specific rules.  
1088 *Database* **2019**.  
1089 <https://academic.oup.com/database/article/doi/10.1093/database/baz026/5363830>  
1090 (Accessed March 5, 2022).
- 1091 Chen G, Liu X, Zhang Y, Lin S, Yang Z, Johansson J, Rising A, Meng Q. 2012. Full-Length  
1092 Minor Ampullate Spidroin Gene Sequence ed. V.N. Uversky. *PLoS ONE* **7**: e52293.
- 1093 Chen L-Y, VanBuren R, Paris M, Zhou H, Zhang X, Wai CM, Yan H, Chen S, Alonge M,  
1094 Ramakrishnan S, et al. 2019b. The bracteatus pineapple genome and domestication of  
1095 clonally propagated crops. *Nat Genet* **51**: 1549–1558.
- 1096 Choi D, Choy KL. 2020. Spider silk binder for Si-based anode in lithium-ion batteries. *Materials*  
1097 *& Design* **191**: 108669.
- 1098 Clarke TH, Garb JE, Hayashi CY, Arensburger P, Ayoub NA. 2015. Spider Transcriptomes  
1099 Identify Ancient Large-Scale Gene Duplication Event Potentially Important in Silk Gland  
1100 Evolution. *Genome Biol Evol* **7**: 1856–1870.
- 1101 Clarke TH, Garb JE, Hayashi CY, Haney RA, Lancaster AK, Corbett S, Ayoub NA. 2014. Multi-  
1102 tissue transcriptomics of the black widow spider reveals expansions, co-options, and  
1103 functional processes of the silk gland gene toolkit. *BMC Genomics* **15**: 365.
- 1104 Coddington JA. 1986. ORB WEBS IN “NON-ORB WEAVING” OGRE-FACED SPIDERS  
1105 (ARANEAE: DINOPIDAE): A QUESTION OF GENEALOGY. *Cladistics* **2**: 53–67.
- 1106 Coddington JA, Agnarsson I, Hamilton CA, Bond JE. 2019. Spiders did not repeatedly gain, but  
1107 repeatedly lost, foraging webs. *PeerJ* **7**: e6703.
- 1108 Correa-Garhwal SM, Chaw RC, Clarke TH, Alaniz LG, Chan FS, Alfaro RE, Hayashi CY. 2018.  
1109 Silk genes and silk gene expression in the spider *Tengella perfuga* (Zoropsidae),  
1110 including a potential cribellar spidroin (CrSp) ed. P. Heneberg. *PLoS ONE* **13**:  
1111 e0203563.
- 1112 Corver A, Wilkerson N, Miller J, Gordus A. 2021. Distinct movement patterns generate stages of  
1113 spider web building. *Current Biology* **31**: 4983-4997.e5.
- 1114 Dierckxsens N, Mardulyn P, Smits G. 2016. NOVOPlasty: *de novo* assembly of organelle  
1115 genomes from whole genome data. *Nucleic Acids Res* gkw955.
- 1116 Eberhard WG. 1971. The ecology of the web of *Uloborus diversus* (Araneae: Uloboridae).  
1117 *Oecologia* **6**: 328–342.

- 1118 Escuer P, Pisarenco VA, Fernández-Ruiz AA, Vizueta J, Sánchez-Herrero JF, Arnedo MA,  
1119 Sánchez-Gracia A, Rozas J. 2022. The chromosome-scale assembly of the Canary  
1120 Islands endemic spider *Dysdera silvatica* (Arachnida, Araneae) sheds light on the origin  
1121 and genome structure of chemoreceptor gene families in chelicerates. *Molecular*  
1122 *Ecology Resources* **22**: 375–390.
- 1123 Fan Z, Yuan T, Liu P, Wang L-Y, Jin J-F, Zhang F, Zhang Z-S. 2021. A chromosome-level  
1124 genome of the spider *Trichonephila antipodiana* reveals the genetic basis of its  
1125 polyphagy and evidence of an ancient whole-genome duplication event. *GigaScience*  
1126 **10**: giab016.
- 1127 Fang W-Y, Wang Z-L, Li C, Yang X-Q, Yu X-P. 2016. The complete mitogenome of a jumping  
1128 spider *Carrhotus xanthogramma* (Araneae: Salticidae) and comparative analysis in four  
1129 salticid mitogenomes. *Genetica* **144**: 699–709.
- 1130 Fernández R, Kallal RJ, Dimitrov D, Ballesteros JA, Arnedo MA, Giribet G, Hormiga G. 2018.  
1131 Phylogenomics, Diversification Dynamics, and Comparative Transcriptomics across the  
1132 Spider Tree of Life. *Current Biology* **28**: 1489-1497.e5.
- 1133 Flynn JM, Hubley R, Goubert C, Rosen J, Clark AG, Feschotte C, Smit AF. 2020.  
1134 RepeatModeler2 for automated genomic discovery of transposable element families.  
1135 *Proc Natl Acad Sci USA* **117**: 9451–9457.
- 1136 Foelix RF. 2011. *Biology of spiders*. 3rd ed. Oxford University Press, Oxford; New York.
- 1137 Garb JE, Hayashi CY. 2005. Modular evolution of egg case silk genes across orb-weaving  
1138 spider superfamilies. *Proc Natl Acad Sci USA* **102**: 11379–11384.
- 1139 Garb JE, Sharma PP, Ayoub NA. 2018. Recent progress and prospects for advancing arachnid  
1140 genomics. *Current Opinion in Insect Science* **25**: 51–57.
- 1141 Garcia-Fernández J, Holland PWH. 1994. Archetypal organization of the amphioxus Hox gene  
1142 cluster. *Nature* **370**: 563–566.
- 1143 Gasteiger E. 2003. ExPASy: the proteomics server for in-depth protein knowledge and analysis.  
1144 *Nucleic Acids Research* **31**: 3784–3788.
- 1145 Gatesy J, Hayashi C, Motriuk D, Woods J, Lewis R. 2001. Extreme Diversity, Conservation, and  
1146 Convergence of Spider Silk Fibroin Sequences. *Science* **291**: 2603–2605.
- 1147 Giani AM, Gallo GR, Gianfranceschi L, Formenti G. 2020. Long walk to genomics: History and  
1148 current approaches to genome sequencing and assembly. *Computational and Structural*  
1149 *Biotechnology Journal* **18**: 9–19.
- 1150 Gillespie M, Jassal B, Stephan R, Milacic M, Rothfels K, Senff-Ribeiro A, Griss J, Sevilla C,  
1151 Matthews L, Gong C, et al. 2022. The reactome pathway knowledgebase 2022. *Nucleic*  
1152 *Acids Research* **50**: D687–D692.
- 1153 Glatz L. 1967. Zur biologie und morphologie von *Oecobius annulipes* lucas (Araneae,  
1154 *Oecobiidae*). *Z Morph Tiere* **61**: 185–214.

- 1155 Gloor D, Nentwig W, Blick T, Kropf C. 2017. World Spider Catalog. <http://wsc.nmbe.ch>  
1156 (Accessed February 4, 2022).
- 1157 Gotoh O. 2008. A space-efficient and accurate method for mapping and aligning cDNA  
1158 sequences onto genomic sequence. *Nucleic Acids Research* **36**: 2630–2638.
- 1159 Gough J, Karplus K, Hughey R, Chothia C. 2001. Assignment of homology to genome  
1160 sequences using a library of hidden Markov models that represent all proteins of known  
1161 structure. *Journal of Molecular Biology* **313**: 903–919.
- 1162 Gurevich A, Saveliev V, Vyahhi N, Tesler G. 2013. QUAST: quality assessment tool for genome  
1163 assemblies. *Bioinformatics* **29**: 1072–1075.
- 1164 Haas BJ, Papanicolaou A, Yassour M, Grabherr M, Blood PD, Bowden J, Couger MB, Eccles D,  
1165 Li B, Lieber M, et al. 2013. De novo transcript sequence reconstruction from RNA-seq  
1166 using the Trinity platform for reference generation and analysis. *Nat Protoc* **8**: 1494–  
1167 1512.
- 1168 Haft DH. 2003. The TIGRFAMs database of protein families. *Nucleic Acids Research* **31**: 371–  
1169 373.
- 1170 Haft DH. 2001. TIGRFAMs: a protein family resource for the functional identification of proteins.  
1171 *Nucleic Acids Research* **29**: 41–43.
- 1172 Haft DH, Selengut JD, Richter RA, Harkins D, Basu MK, Beck E. 2012. TIGRFAMs and  
1173 Genome Properties in 2013. *Nucleic Acids Research* **41**: D387–D395.
- 1174 Hakes L, Pinney JW, Lovell SC, Oliver SG, Robertson DL. 2007. All duplicates are not equal:  
1175 the difference between small-scale and genome duplication. *Genome Biol* **8**: R209.
- 1176 Hawthorn AC, Opell BD. 2003. van der Waals and hygroscopic forces of adhesion generated by  
1177 spider capture threads. *Journal of Experimental Biology* **206**: 3905–3911.
- 1178 Hayashi CY. 2004. Molecular and Mechanical Characterization of Aciniform Silk: Uniformity of  
1179 Iterated Sequence Modules in a Novel Member of the Spider Silk Fibroin Gene Family.  
1180 *Molecular Biology and Evolution* **21**: 1950–1959.
- 1181 Hayashi CY, Lewis RV. 1998. Evidence from flagelliform silk cDNA for the structural basis of  
1182 elasticity and modular nature of spider silks 1 Edited by M. F. Moody. *Journal of*  
1183 *Molecular Biology* **275**: 773–784.
- 1184 Hayashi CY, Lewis RV. 2000. Molecular Architecture and Evolution of a Modular Spider Silk  
1185 Protein Gene. *Science* **287**: 1477–1479.
- 1186 Hendrickx F, De Corte Z, Sonet G, Van Belleghem SM, Köstlbacher S, Vangestel C. 2022. A  
1187 masculinizing supergene underlies an exaggerated male reproductive morph in a spider.  
1188 *Nat Ecol Evol* **6**: 195–206.
- 1189 Hesselberg T, Vollrath F. 2004. The effects of neurotoxins on web-geometry and web-building  
1190 behaviour in *Araneus diadematus* Cl. *Physiology & Behavior* **82**: 519–529.



- 1191 Hoff KJ, Lange S, Lomsadze A, Borodovsky M, Stanke M. 2016. BRAKER1: Unsupervised  
1192 RNA-Seq-Based Genome Annotation with GeneMark-ET and AUGUSTUS: Table 1.  
1193 *Bioinformatics* **32**: 767–769.
- 1194 Hoff KJ, Lomsadze A, Borodovsky M, Stanke M. 2019. Whole-Genome Annotation with  
1195 BRAKER. In *Gene Prediction* (ed. M. Kollmar), Vol. 1962 of *Methods in Molecular*  
1196 *Biology*, pp. 65–95, Springer New York, New York, NY  
1197 [http://link.springer.com/10.1007/978-1-4939-9173-0\\_5](http://link.springer.com/10.1007/978-1-4939-9173-0_5) (Accessed January 29, 2022).
- 1198 Iwata H, Gotoh O. 2012. Benchmarking spliced alignment programs including Spaln2, an  
1199 extended version of Spaln that incorporates additional species-specific features. *Nucleic*  
1200 *Acids Research* **40**: e161–e161.
- 1201 Jassal B, Matthews L, Viteri G, Gong C, Lorente P, Fabregat A, Sidiropoulos K, Cook J,  
1202 Gillespie M, Haw R, et al. 2019. The reactome pathway knowledgebase. *Nucleic Acids*  
1203 *Research* gkz1031.
- 1204 Jones P, Binns D, Chang H-Y, Fraser M, Li W, McAnulla C, McWilliam H, Maslen J, Mitchell A,  
1205 Nuka G, et al. 2014. InterProScan 5: genome-scale protein function classification.  
1206 *Bioinformatics* **30**: 1236–1240.
- 1207 Kallal RJ, Kulkarni SS, Dimitrov D, Benavides LR, Arnedo MA, Giribet G, Hormiga G. 2021.  
1208 Converging on the orb: denser taxon sampling elucidates spider phylogeny and new  
1209 analytical methods support repeated evolution of the orb web. *Cladistics* **37**: 298–316.
- 1210 Kim D, Paggi JM, Park C, Bennett C, Salzberg SL. 2019. Graph-based genome alignment and  
1211 genotyping with HISAT2 and HISAT-genotype. *Nat Biotechnol* **37**: 907–915.
- 1212 Kim JY, Yoo JS, Park YC. 2014. The complete mitochondrial genome of the green crab spider  
1213 *Oxytate striatipes* (Araneae: Thomisidae). *Mitochondrial DNA* 1–2.
- 1214 Kono N, Nakamura H, Mori M, Tomita M, Arakawa K. 2020. Spidroin profiling of cribellate  
1215 spiders provides insight into the evolution of spider prey capture strategies. *Sci Rep* **10**:  
1216 15721.
- 1217 Kono N, Nakamura H, Mori M, Yoshida Y, Ohtoshi R, Malay AD, Pedrazzoli Moran DA, Tomita  
1218 M, Numata K, Arakawa K. 2021a. Multicomponent nature underlies the extraordinary  
1219 mechanical properties of spider dragline silk. *Proc Natl Acad Sci USA* **118**:  
1220 e2107065118.
- 1221 Kono N, Nakamura H, Ohtoshi R, Moran DAP, Shinohara A, Yoshida Y, Fujiwara M, Mori M,  
1222 Tomita M, Arakawa K. 2019. Orb-weaving spider *Araneus ventricosus* genome  
1223 elucidates the spidroin gene catalogue. *Sci Rep* **9**: 8380.
- 1224 Kono N, Ohtoshi R, Malay AD, Mori M, Masunaga H, Yoshida Y, Nakamura H, Numata K,  
1225 Arakawa K. 2021b. Darwin's bark spider shares a spidroin repertoire with *Caerostris*  
1226 *extrusa* but achieves extraordinary silk toughness through gene expression. *Open Biol*  
1227 **11**: 210242.
- 1228 Král J, Forman M, Kořínková T, Lerma ACR, Haddad CR, Musilová J, Řezáč M, Herrera IMÁ,  
1229 Thakur S, Dippenaar-Schoeman AS, et al. 2019. Insights into the karyotype and genome

- 1230 evolution of haplogyne spiders indicate a polyploid origin of lineage with holokinetic  
1231 chromosomes. *Sci Rep* **9**: 3001.
- 1232 Kriventseva EV, Kuznetsov D, Tegenfeldt F, Manni M, Dias R, Simão FA, Zdobnov EM. 2019.  
1233 OrthoDB v10: sampling the diversity of animal, plant, fungal, protist, bacterial and viral  
1234 genomes for evolutionary and functional annotations of orthologs. *Nucleic Acids*  
1235 *Research* **47**: D807–D811.
- 1236 Krueger F, James F, Ewels P, Afyounian E, Schuster-Boeckler B. 2021.  
1237 *FelixKrueger/TrimGalore: v0.6.7 - DOI via Zenodo*. Zenodo  
1238 <https://zenodo.org/record/5127899> (Accessed February 4, 2022).
- 1239 Kumar V, Tyagi K, Chakraborty R, Prasad P, Kundu S, Tyagi I, Chandra K. 2020. The Complete  
1240 Mitochondrial Genome of endemic giant tarantula, *Lyrognathus crotalus* (Araneae:  
1241 Theraphosidae) and comparative analysis. *Sci Rep* **10**: 74.
- 1242 Kumari S, Lang G, DeSimone E, Spengler C, Trossmann VT, Lücker S, Hudel M, Jacobs K,  
1243 Krämer N, Scheibel T. 2020. Engineered spider silk-based 2D and 3D materials prevent  
1244 microbial infestation. *Materials Today* **41**: 21–33.
- 1245 Kyte J, Doolittle RF. 1982. A simple method for displaying the hydropathic character of a  
1246 protein. *Journal of Molecular Biology* **157**: 105–132.
- 1247 Letunic I, Bork P. 2018. 20 years of the SMART protein domain annotation resource. *Nucleic*  
1248 *Acids Research* **46**: D493–D496.
- 1249 Letunic I, Khedkar S, Bork P. 2021. SMART: recent updates, new developments and status in  
1250 2020. *Nucleic Acids Research* **49**: D458–D460.
- 1251 Lewis RV. 2006. Spider Silk: Ancient Ideas for New Biomaterials. *Chem Rev* **106**: 3762–3774.
- 1252 Lewis TE, Sillitoe I, Dawson N, Lam SD, Clarke T, Lee D, Orengo C, Lees J. 2018. Gene3D:  
1253 Extensive prediction of globular domains in proteins. *Nucleic Acids Research* **46**: D435–  
1254 D439.
- 1255 Li C, Wang Z-L, Fang W-Y, Yu X-P. 2016. The complete mitochondrial genome of the orb-  
1256 weaving spider *Neoscona theisi* (Walckenaer) (Araneae: Araneidae). *Mitochondrial DNA*  
1257 *Part A* **27**: 4035–4036.
- 1258 Li H. 2018. Minimap2: pairwise alignment for nucleotide sequences ed. I. Birol. *Bioinformatics*  
1259 **34**: 3094–3100.
- 1260 Li H. 2021. New strategies to improve minimap2 alignment accuracy. *arXiv:210803515 [q-bio]*.  
1261 <http://arxiv.org/abs/2108.03515> (Accessed February 18, 2022).
- 1262 Li H, Handsaker B, Wysoker A, Fennell T, Ruan J, Homer N, Marth G, Abecasis G, Durbin R,  
1263 1000 Genome Project Data Processing Subgroup. 2009. The Sequence Alignment/Map  
1264 format and SAMtools. *Bioinformatics* **25**: 2078–2079.

- 1265 Li X, Shi C-H, Tang C-L, Cai Y-M, Meng Q. 2017. The correlation between the length of  
1266 repetitive domain and mechanical properties of the recombinant flagelliform spidroin.  
1267 *Biology Open* bio.022665.
- 1268 Li Y-Y, Tsai J-M, Wu C-Y, Chiu Y-F, Li H-Y, Warrit N, Wan Y-C, Lin Y-P, Cheng R-C, Su Y-C.  
1269 2022. In Silico Assessment of Probe-Capturing Strategies and Effectiveness in the  
1270 Spider Sub-Lineage Araneoidea (Order: Araneae). *Diversity* **14**: 184.
- 1271 Liu FYC, Liu JYX, Yao X, Wang B. 2022. Hybrid sequencing reveals the full-length *Nephila*  
1272 *pilipes* pyriform spidroin 1 (PySp1). *International Journal of Biological Macromolecules*  
1273 **200**: 362–369.
- 1274 Liu M, Zhang Z, Peng Z. 2015. The mitochondrial genome of the water spider *Argyroneta*  
1275 *aquatica* (Araneae: Cybaeidae). *Zool Scr* **44**: 179–190.
- 1276 Liu S, Aagaard A, Bechsgaard J, Bilde T. 2019. DNA Methylation Patterns in the Social Spider,  
1277 *Stegodyphus dumicola*. *Genes* **10**: 137.
- 1278 Liu Z, Zhang M, Zhang Y, Xu Y, Zhang Y, Yang X, Zhang J, Yang J, Yuan L. 2020. Spider silk-  
1279 based tapered optical fiber for humidity sensing based on multimode interference.  
1280 *Sensors and Actuators A: Physical* **313**: 112179.
- 1281 Lomsadze A. 2005. Gene identification in novel eukaryotic genomes by self-training algorithm.  
1282 *Nucleic Acids Research* **33**: 6494–6506.
- 1283 Lomsadze A, Burns PD, Borodovsky M. 2014. Integration of mapped RNA-Seq reads into  
1284 automatic training of eukaryotic gene finding algorithm. *Nucleic Acids Research* **42**:  
1285 e119–e119.
- 1286 Lu S, Wang J, Chitsaz F, Derbyshire MK, Geer RC, Gonzales NR, Gwadz M, Hurwitz DI,  
1287 Marchler GH, Song JS, et al. 2020. CDD/SPARCLE: the conserved domain database in  
1288 2020. *Nucleic Acids Research* **48**: D265–D268.
- 1289 Malay AD, Arakawa K, Numata K. 2017. Analysis of repetitive amino acid motifs reveals the  
1290 essential features of spider dragline silk proteins ed. Q. Zou. *PLoS ONE* **12**: e0183397.
- 1291 Marçais G, Kingsford C. 2011. A fast, lock-free approach for efficient parallel counting of  
1292 occurrences of k-mers. *Bioinformatics* **27**: 764–770.
- 1293 Masta SE, Boore JL. 2008. Parallel Evolution of Truncated Transfer RNA Genes in Arachnid  
1294 Mitochondrial Genomes. *Molecular Biology and Evolution* **25**: 949–959.
- 1295 Mayank, Bardenhagen A, Sethi V, Gudwani H. 2022. Spider-silk composite material for  
1296 aerospace application. *Acta Astronautica* **193**: 704–709.
- 1297 Mi H, Muruganujan A, Huang X, Ebert D, Mills C, Guo X, Thomas PD. 2019. Protocol Update for  
1298 large-scale genome and gene function analysis with the PANTHER classification system  
1299 (v.14.0). *Nat Protoc* **14**: 703–721.

- 1300 Mistry J, Chuguransky S, Williams L, Qureshi M, Salazar GA, Sonnhammer ELL, Tosatto SCE,  
1301 Paladin L, Raj S, Richardson LJ, et al. 2021. Pfam: The protein families database in  
1302 2021. *Nucleic Acids Research* **49**: D412–D419.
- 1303 Motriuk-Smith D, Smith A, Hayashi CY, Lewis RV. 2005. Analysis of the Conserved N-Terminal  
1304 Domains in Major Ampullate Spider Silk Proteins. *Biomacromolecules* **6**: 3152–3159.
- 1305 Necci M, Piovesan D, Dosztányi Z, Tosatto SCE. 2017. MobiDB-lite: Fast and highly specific  
1306 consensus prediction of intrinsic disorder in proteins. *Bioinformatics* btx015.
- 1307 Ohno S. 2013. *Evolution by Gene Duplication*. Springer Berlin / Heidelberg, Berlin, Heidelberg  
1308 <https://public.ebookcentral.proquest.com/choice/publicfullrecord.aspx?p=5585971>  
1309 (Accessed March 7, 2022).
- 1310 Öksüz KE, Özkaya NK, İnan ZDŞ, Özer A. 2021. Novel natural spider silk embedded  
1311 electrospun nanofiber mats for wound healing. *Materials Today Communications* **26**:  
1312 101942.
- 1313 Opell BD, Hendricks ML. 2010. The role of granules within viscous capture threads of orb-  
1314 weaving spiders. *Journal of Experimental Biology* **213**: 339–346.
- 1315 Pace RM, Grbić M, Nagy LM. 2016. Composition and genomic organization of arthropod Hox  
1316 clusters. *EvoDevo* **7**: 11.
- 1317 Pan W-J, Fang H-Y, Zhang P, Pan H-C. 2016. The complete mitochondrial genome of flat  
1318 spider *Selenops bursarius* (Araneae: Selenopidae). *Mitochondrial DNA* **27**: 1488–1489.
- 1319 Pan W-J, Fang H-Y, Zhang P, Pan H-C. 2014. The complete mitochondrial genome of striped  
1320 lynx spider *Oxyopes sertatus* (Araneae: Oxyopidae). *Mitochondrial DNA* 1–2.
- 1321 Pandurangan AP, Stahlhacke J, Oates ME, Smithers B, Gough J. 2019. The SUPERFAMILY  
1322 2.0 database: a significant proteome update and a new webserver. *Nucleic Acids*  
1323 *Research* **47**: D490–D494.
- 1324 Pedruzzi I, Rivoire C, Auchincloss AH, Coudert E, Keller G, de Castro E, Baratin D, Cuche BA,  
1325 Bougueleret L, Poux S, et al. 2015. HAMAP in 2015: updates to the protein family  
1326 classification and annotation system. *Nucleic Acids Research* **43**: D1064–D1070.
- 1327 Peters HM. 1992. On the spinning apparatus and the structure of the capture threads  
1328 of *Deinopis subrufus* (Araneae, Deinopidae). *Zoomorphology* **112**: 27–37.
- 1329 Peters HM. 1984. The spinning apparatus of Uloboridae in relation to the structure and  
1330 construction of capture threads (Arachnida, Araneida). *Zoomorphology* **104**: 96–104.
- 1331 Piorkowski D, Blackledge TA, Liao C-P, Joel A-C, Weissbach M, Wu C-L, Tso I-M. 2020.  
1332 Uncoiling springs promote mechanical functionality of spider cribellate silk. *Journal of*  
1333 *Experimental Biology* jeb.215269.
- 1334 Pons J, Bover P, Bidegaray-Batista L, Arnedo MA. 2019. Arm-less mitochondrial tRNAs  
1335 conserved for over 30 millions of years in spiders. *BMC Genomics* **20**: 665.

- 1336 Purcell J, Pruitt JN. 2019. Are personalities genetically determined? Inferences from subsocial  
1337 spiders. *BMC Genomics* **20**: 867.
- 1338 Putnam NH, O'Connell BL, Stites JC, Rice BJ, Blanchette M, Calef R, Troll CJ, Fields A, Hartley  
1339 PD, Sugnet CW, et al. 2016. Chromosome-scale shotgun assembly using an in vitro  
1340 method for long-range linkage. *Genome Res* **26**: 342–350.
- 1341 Qiu Y, Song D, Zhou K, Sun H. 2005. The Mitochondrial Sequences of Heptathela  
1342 hangzhouensis and Ornithoctonus huwena Reveal Unique Gene Arrangements and  
1343 Atypical tRNAs. *J Mol Evol* **60**: 57–71.
- 1344 Quevillon E, Silventoinen V, Pillai S, Harte N, Mulder N, Apweiler R, Lopez R. 2005.  
1345 InterProScan: protein domains identifier. *Nucleic Acids Research* **33**: W116–W120.
- 1346 Ranallo-Benavidez TR, Jaron KS, Schatz MC. 2020. GenomeScope 2.0 and Smudgeplot for  
1347 reference-free profiling of polyploid genomes. *Nat Commun* **11**: 1432.
- 1348 Reed CF, Witt PN, Scarboro MB. 1982. Maturation and amphetamine-induced changes in web  
1349 building. *Dev Psychobiol* **15**: 61–70.
- 1350 Rens W, O'Brien PC, Grutzner F, Clarke O, Graphodatskaya D, Tsend-Ayush E, Trifonov VA,  
1351 Skelton H, Wallis MC, Johnston S, et al. 2007. The multiple sex chromosomes of  
1352 platypus and echidna are not completely identical and several share homology with the  
1353 avian Z. *Genome Biol* **8**: R243.
- 1354 Rice P, Longden I, Bleasby A. 2000. EMBOSS: The European Molecular Biology Open  
1355 Software Suite. *Trends in Genetics* **16**: 276–277.
- 1356 Rising A, Nimmervoll H, Grip S, Fernandez-Arias A, Storckenfeldt E, Knight DP, Vollrath F,  
1357 Engström W. 2005. Spider Silk Proteins – Mechanical Property and Gene Sequence.  
1358 *Zoological Science* **22**: 273–281.
- 1359 Roberson EJ, Chips MJ, Carson WP, Rooney TP. 2016. Deer herbivory reduces web-building  
1360 spider abundance by simplifying forest vegetation structure. *PeerJ* **4**: e2538.
- 1361 Sahni V, Blackledge TA, Dhinojwala A. 2010. Viscoelastic solids explain spider web stickiness.  
1362 *Nat Commun* **1**: 19.
- 1363 Sánchez-Herrero JF, Frías-López C, Escuer P, Hinojosa-Alvarez S, Arnedo MA, Sánchez-  
1364 Gracia A, Rozas J. 2019. The draft genome sequence of the spider *Dysdera silvatica*  
1365 (Araneae, Dysderidae): A valuable resource for functional and evolutionary genomic  
1366 studies in chelicerates. *GigaScience* **8**: giz099.
- 1367 Sanggaard KW, Bechsgaard JS, Fang X, Duan J, Dyrland TF, Gupta V, Jiang X, Cheng L, Fan  
1368 D, Feng Y, et al. 2014. Spider genomes provide insight into composition and evolution of  
1369 venom and silk. *Nat Commun* **5**: 3765.
- 1370 Schwager EE, Sharma PP, Clarke T, Leite DJ, Wierschin T, Pechmann M, Akiyama-Oda Y,  
1371 Esposito L, Bechsgaard J, Bilde T, et al. 2017. The house spider genome reveals an  
1372 ancient whole-genome duplication during arachnid evolution. *BMC Biol* **15**: 62.

- 1373 Seeman T. 2018. *Barrnap: BAsic RApbid Ribosomal RNA Predictor*.  
1374 [github.com/tseemann/barrnap](https://github.com/tseemann/barrnap).
- 1375 Selengut JD, Haft DH, Davidsen T, Ganapathy A, Gwinn-Giglio M, Nelson WC, Richter AR,  
1376 White O. 2007. TIGRFAMs and Genome Properties: tools for the assignment of  
1377 molecular function and biological process in prokaryotic genomes. *Nucleic Acids*  
1378 *Research* **35**: D260–D264.
- 1379 Sember A, Pappová M, Forman M, Nguyen P, Marec F, Dalíková M, Divišová K, Doležálková-  
1380 Kaštánková M, Zrzavá M, Sadílek D, et al. 2020. Patterns of Sex Chromosome  
1381 Differentiation in Spiders: Insights from Comparative Genomic Hybridisation. *Genes* **11**:  
1382 849.
- 1383 Sémon M, Wolfe KH. 2007. Consequences of genome duplication. *Current Opinion in Genetics*  
1384 *& Development* **17**: 505–512.
- 1385 Seppey M, Manni M, Zdobnov EM. 2019. BUSCO: Assessing Genome Assembly and  
1386 Annotation Completeness. In *Gene Prediction* (ed. M. Kollmar), Vol. 1962 of *Methods in*  
1387 *Molecular Biology*, pp. 227–245, Springer New York, New York, NY  
1388 [http://link.springer.com/10.1007/978-1-4939-9173-0\\_14](http://link.springer.com/10.1007/978-1-4939-9173-0_14) (Accessed February 4, 2022).
- 1389 Sheffer MM, Hoppe A, Krehenwinkel H, Uhl G, Kuss AW, Jensen L, Jensen C, Gillespie RG,  
1390 Hoff KJ, Prost S. 2021. Chromosome-level reference genome of the European wasp  
1391 spider *Argiope bruennichi*: a resource for studies on range expansion and evolutionary  
1392 adaptation. *GigaScience* **10**: gjaa148.
- 1393 Sigrist CJA. 2002. PROSITE: A documented database using patterns and profiles as motif  
1394 descriptors. *Briefings in Bioinformatics* **3**: 265–274.
- 1395 Sigrist CJA, de Castro E, Cerutti L, Cuče BA, Hulo N, Bridge A, Bougueleret L, Xenarios I.  
1396 2012. New and continuing developments at PROSITE. *Nucleic Acids Research* **41**:  
1397 D344–D347.
- 1398 Simão FA, Waterhouse RM, Ioannidis P, Kriventseva EV, Zdobnov EM. 2015. BUSCO:  
1399 assessing genome assembly and annotation completeness with single-copy orthologs.  
1400 *Bioinformatics* **31**: 3210–3212.
- 1401 Song B, Marco-Sola S, Moreto M, Johnson L, Buckler ES, Stitzer MC. 2022. AnchorWave:  
1402 Sensitive alignment of genomes with high sequence diversity, extensive structural  
1403 polymorphism, and whole-genome duplication. *Proc Natl Acad Sci USA* **119**:  
1404 e2113075119.
- 1405 Song L, Shankar DS, Florea L. 2016. Rascaf: Improving Genome Assembly with RNA  
1406 Sequencing Data. *Plant Genome* **9**.  
1407 <https://onlinelibrary.wiley.com/doi/10.3835/plantgenome2016.03.0027> (Accessed  
1408 February 4, 2022).
- 1409 Stanke M, Diekhans M, Baertsch R, Haussler D. 2008. Using native and syntenically mapped  
1410 cDNA alignments to improve de novo gene finding. *Bioinformatics* **24**: 637–644.

- 1411 Stanke M, Schöffmann O, Morgenstern B, Waack S. 2006. Gene prediction in eukaryotes with a  
1412 generalized hidden Markov model that uses hints from external sources. *BMC*  
1413 *Bioinformatics* **7**: 62.
- 1414 Stellwagen SD, Renberg RL. 2019. Toward Spider Glue: Long Read Scaffolding for Extreme  
1415 Length and Repetitious Silk Family Genes AgSp1 and AgSp2 with Insights into  
1416 Functional Adaptation. *G3 Genes/Genomes/Genetics* **9**: 1909–1919.
- 1417 Storer J, Hubley R, Rosen J, Wheeler TJ, Smit AF. 2021. The Dfam community resource of  
1418 transposable element families, sequence models, and genome annotations. *Mobile DNA*  
1419 **12**: 2.
- 1420 Stothard P, Wishart DS. 2005. Circular genome visualization and exploration using CGView.  
1421 *Bioinformatics* **21**: 537–539.
- 1422 Tarailo-Graovac M, Chen N. 2009. Using RepeatMasker to Identify Repetitive Elements in  
1423 Genomic Sequences. *Current Protocols in Bioinformatics* **25**.  
1424 <https://onlinelibrary.wiley.com/doi/10.1002/0471250953.bi0410s25> (Accessed February  
1425 4, 2022).
- 1426 Tarakanova A, Buehler MJ. 2012. The role of capture spiral silk properties in the diversification  
1427 of orb webs. *J R Soc Interface* **9**: 3240–3248.
- 1428 Teufel F, Almagro Armenteros JJ, Johansen AR, Gíslason MH, Pihl SI, Tsirigos KD, Winther O,  
1429 Brunak S, von Heijne G, Nielsen H. 2022. SignalP 6.0 predicts all five types of signal  
1430 peptides using protein language models. *Nat Biotechnol*.  
1431 <https://www.nature.com/articles/s41587-021-01156-3> (Accessed February 4, 2022).
- 1432 Teulé F, Furin WA, Cooper AR, Duncan JR, Lewis RV. 2007. Modifications of spider silk  
1433 sequences in an attempt to control the mechanical properties of the synthetic fibers. *J*  
1434 *Mater Sci* **42**: 8974–8985.
- 1435 The Gene Ontology Consortium, Carbon S, Douglass E, Good BM, Unni DR, Harris NL, Mungall  
1436 CJ, Basu S, Chisholm RL, Dodson RJ, et al. 2021. The Gene Ontology resource:  
1437 enriching a GOld mine. *Nucleic Acids Research* **49**: D325–D334.
- 1438 The UniProt Consortium. 2019. UniProt: a worldwide hub of protein knowledge. *Nucleic Acids*  
1439 *Research* **47**: D506–D515.
- 1440 Tian X-X, Pan W-J, Chen L-L, Xu Y-Y, Pan H-C. 2016. The complete mitochondrial genome of  
1441 stretch spider *Tetragnatha maxillosa* (Araneae: Tetragnathidae). *Mitochondrial DNA Part*  
1442 *A* **27**: 3469–3470.
- 1443 Tremblay M-L, Xu L, Lefèvre T, Sarker M, Orrell KE, Leclerc J, Meng Q, Pézolet M, Auger M,  
1444 Liu X-Q, et al. 2015. Spider wrapping silk fibre architecture arising from its modular  
1445 soluble protein precursor. *Sci Rep* **5**: 11502.
- 1446 Vienneau-Hathaway JM, Brassfield ER, Lane AK, Collin MA, Correa-Garhwal SM, Clarke TH,  
1447 Schwager EE, Garb JE, Hayashi CY, Ayoub NA. 2017. Duplication and concerted  
1448 evolution of MiSp-encoding genes underlie the material properties of minor ampullate  
1449 silks of cobweb weaving spiders. *BMC Evol Biol* **17**: 78.

- 1450 Vollrath F. 1999. Biology of spider silk. *International Journal of Biological Macromolecules* **24**:  
1451 81–88.
- 1452 Vollrath F, Selden P. 2007. The Role of Behavior in the Evolution of Spiders, Silks, and Webs.  
1453 *Annu Rev Ecol Evol Syst* **38**: 819–846.
- 1454 Vurture GW, Sedlazeck FJ, Nattestad M, Underwood CJ, Fang H, Gurtowski J, Schatz MC.  
1455 2017. GenomeScope: fast reference-free genome profiling from short reads ed. B.  
1456 Berger. *Bioinformatics* **33**: 2202–2204.
- 1457 Wang K, Wen R, Jia Q, Liu X, Xiao J, Meng Q. 2019a. Analysis of the Full-Length Pyriform  
1458 Spidroin Gene Sequence. *Genes* **10**: 425.
- 1459 Wang Z-L, Li C, Fang W-Y, Yu X-P. 2014. The complete mitochondrial genome of orb-weaving  
1460 spider *Araneus ventricosus* (Araneae: Araneidae). *Mitochondrial DNA* 1–2.
- 1461 Wang Z-L, Li C, Fang W-Y, Yu X-P. 2016a. The complete mitochondrial genome of the wolf  
1462 spider *Wadicosa fidelis* (Araneae: Lycosidae). *Mitochondrial DNA Part A* **27**: 3909–3910.
- 1463 Wang Z-L, Li C, Fang W-Y, Yu X-P. 2016b. The Complete Mitochondrial Genome of two  
1464 *Tetragnatha* Spiders (Araneae: Tetragnathidae): Severe Truncation of tRNAs and Novel  
1465 Gene Rearrangements in Araneae. *Int J Biol Sci* **12**: 109–119.
- 1466 Wang Z-L, Wang Z-Y, Huang J, Yu X-P. 2019b. The complete mitochondrial genome of an orb-  
1467 weaver spider *Araneus angulatus* (Araneae: Araneidae). *Mitochondrial DNA Part B* **4**:  
1468 3870–3871.
- 1469 Waterhouse RM, Seppey M, Simão FA, Manni M, Ioannidis P, Klioutchnikov G, Kriventseva EV,  
1470 Zdobnov EM. 2018. BUSCO Applications from Quality Assessments to Gene Prediction  
1471 and Phylogenomics. *Molecular Biology and Evolution* **35**: 543–548.
- 1472 Waters PD, Patel HR, Ruiz-Herrera A, Álvarez-González L, Lister NC, Simakov O, Ezaz T, Kaur  
1473 P, Frere C, Grützner F, et al. 2021. Microchromosomes are building blocks of bird,  
1474 reptile, and mammal chromosomes. *Proc Natl Acad Sci USA* **118**: e2112494118.
- 1475 Wen R, Liu X, Meng Q. 2017. Characterization of full-length tubuliform spidroin gene from  
1476 *Araneus ventricosus*. *International Journal of Biological Macromolecules* **105**: 702–710.
- 1477 Wen R, Wang K, Liu X, Li X, Mi J, Meng Q. 2018. Molecular cloning and analysis of the full-  
1478 length aciniform spidroin gene from *Araneus ventricosus*. *International Journal of*  
1479 *Biological Macromolecules* **117**: 1352–1360.
- 1480 Wen R, Wang K, Meng Q. 2020. The three novel complete aciniform spidroin variants from  
1481 *Araneus ventricosus* reveal diversity of gene sequences within specific spidroin type.  
1482 *International Journal of Biological Macromolecules* **157**: 60–66.
- 1483 White MJD. 1978. *Modes of speciation*. W. H. Freeman, San Francisco.
- 1484 Witt PN, Reed CF. 1965. Spider-Web Building: Measurement of web geometry identifies  
1485 components in a complex invertebrate behavior pattern. *Science* **149**: 1190–1197.



- 1486 Wu CH. 2004. PIRSF: family classification system at the Protein Information Resource. *Nucleic*  
1487 *Acids Research* **32**: 112D – 114.
- 1488 Xu M, Jiang Y, Pradhan S, Yadavalli VK. 2019. Use of Silk Proteins to Form Organic, Flexible,  
1489 Degradable Biosensors for Metabolite Monitoring. *Front Mater* **6**: 331.
- 1490 Yoshido A, Šíchová J, Pospíšilová K, Nguyen P, Voleníková A, Šafář J, Provazník J, Vila R,  
1491 Marec F. 2020. Evolution of multiple sex-chromosomes associated with dynamic  
1492 genome reshuffling in Leptidea wood-white butterflies. *Heredity* **125**: 138–154.
- 1493 Yu N, Li J, Liu M, Huang L, Bao H, Yang Z, Zhang Y, Gao H, Wang Z, Yang Y, et al. 2019.  
1494 *Genome sequencing and neurotoxin diversity of a wandering spider* *Pardosa*  
1495 *pseudoannulata* (*pond wolf spider*). *Genomics*  
1496 <http://biorxiv.org/lookup/doi/10.1101/747147> (Accessed February 4, 2022).
- 1497 Zhang J. 2003. Evolution by gene duplication: an update. *Trends in Ecology & Evolution* **18**:  
1498 292–298.
- 1499 Zhu B, Jin P, Hou Z, Li J, Wei S, Li S. 2022. Chromosomal-level genome of a sheet-web spider  
1500 provides insight into the composition and evolution of venom. *Molecular Ecology*  
1501 *Resources* 1755–0998.13601.
- 1502 Zhu X-L, Zhang Z-S. 2017. The complete mitochondrial genome of *Agelena silvatica* (Araneae:  
1503 Agelenidae). *Mitochondrial DNA Part B* **2**: 58–59.
- 1504 Zimin AV, Marçais G, Puiu D, Roberts M, Salzberg SL, Yorke JA. 2013. The MaSuRCA genome  
1505 assembler. *Bioinformatics* **29**: 2669–2677.
- 1506 Zimin AV, Puiu D, Luo M-C, Zhu T, Koren S, Marçais G, Yorke JA, Dvořák J, Salzberg SL.  
1507 2017. Hybrid assembly of the large and highly repetitive genome of *Aegilops tauschii*, a  
1508 progenitor of bread wheat, with the MaSuRCA mega-reads algorithm. *Genome Res* **27**:  
1509 787–792.
- 1510 Zimin AV, Salzberg SL. 2022. The SAMBA tool uses long reads to improve the contiguity of  
1511 genome assemblies ed. M. Shao. *PLoS Comput Biol* **18**: e1009860.
- 1512 Zschokke S, Vollrath F. 1995. Web construction patterns in a range of orb weaving spiders  
1513 (Araneae). *European Journal of Entomology* **92**: 523–541.
- 1514

## Figure 1

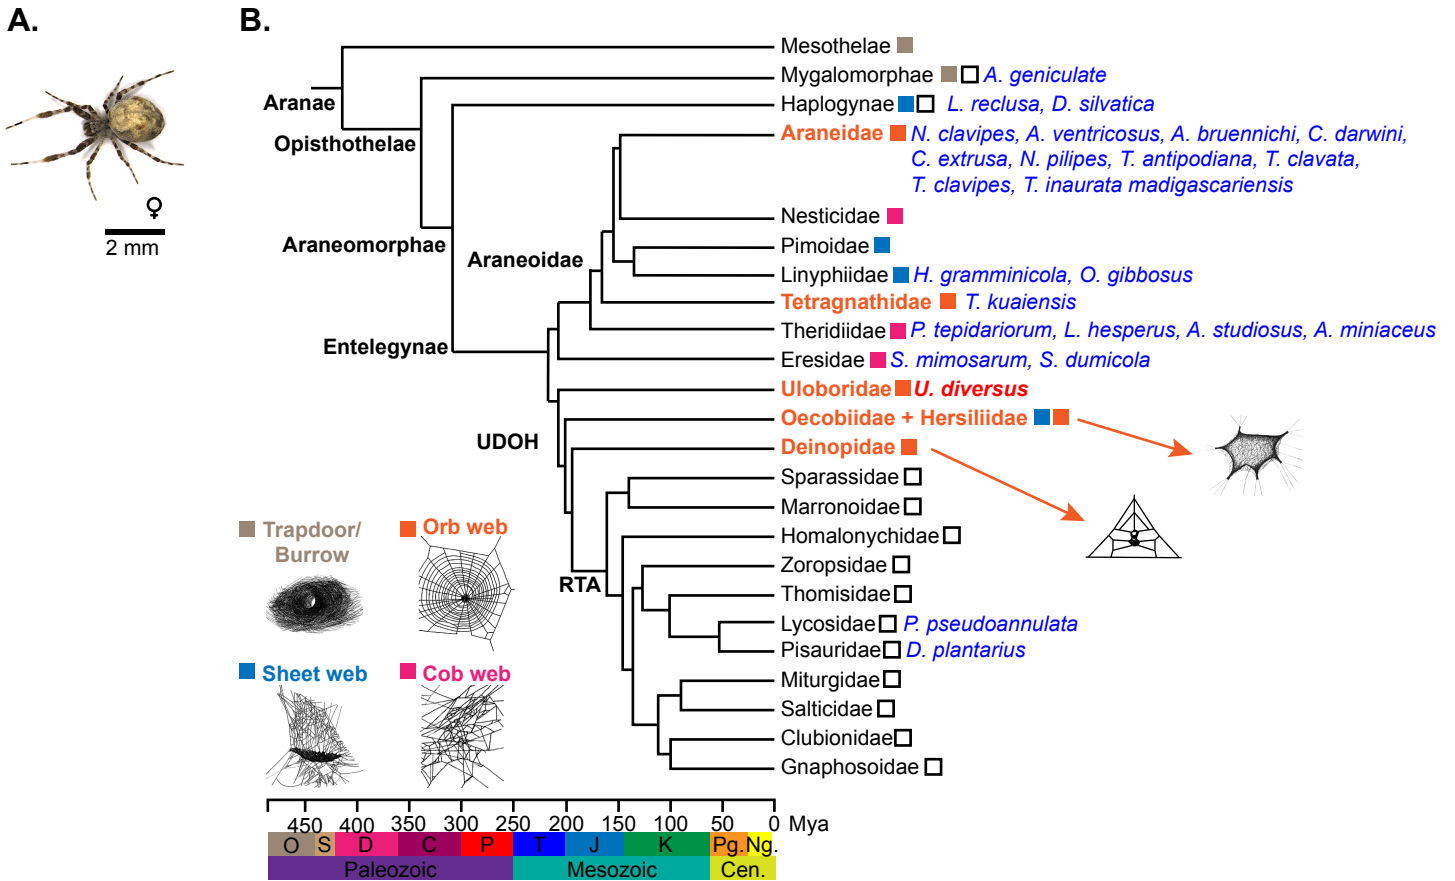

## Figure 2

A.

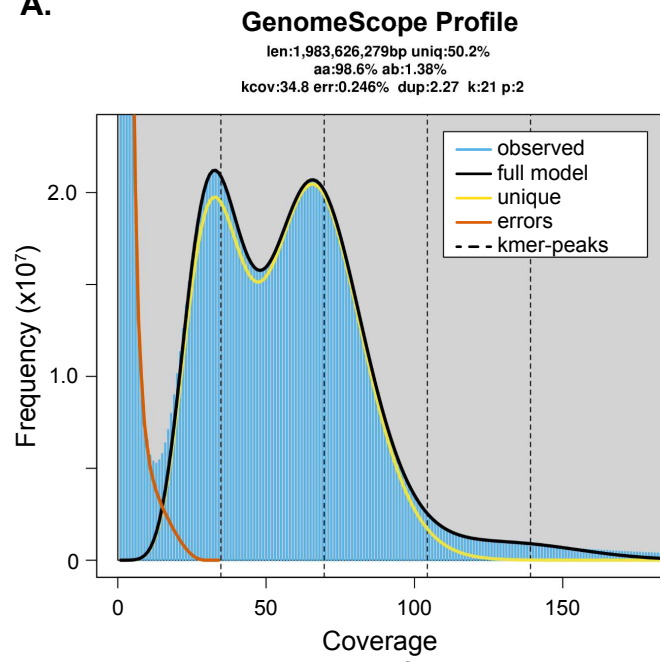

### Figure 3

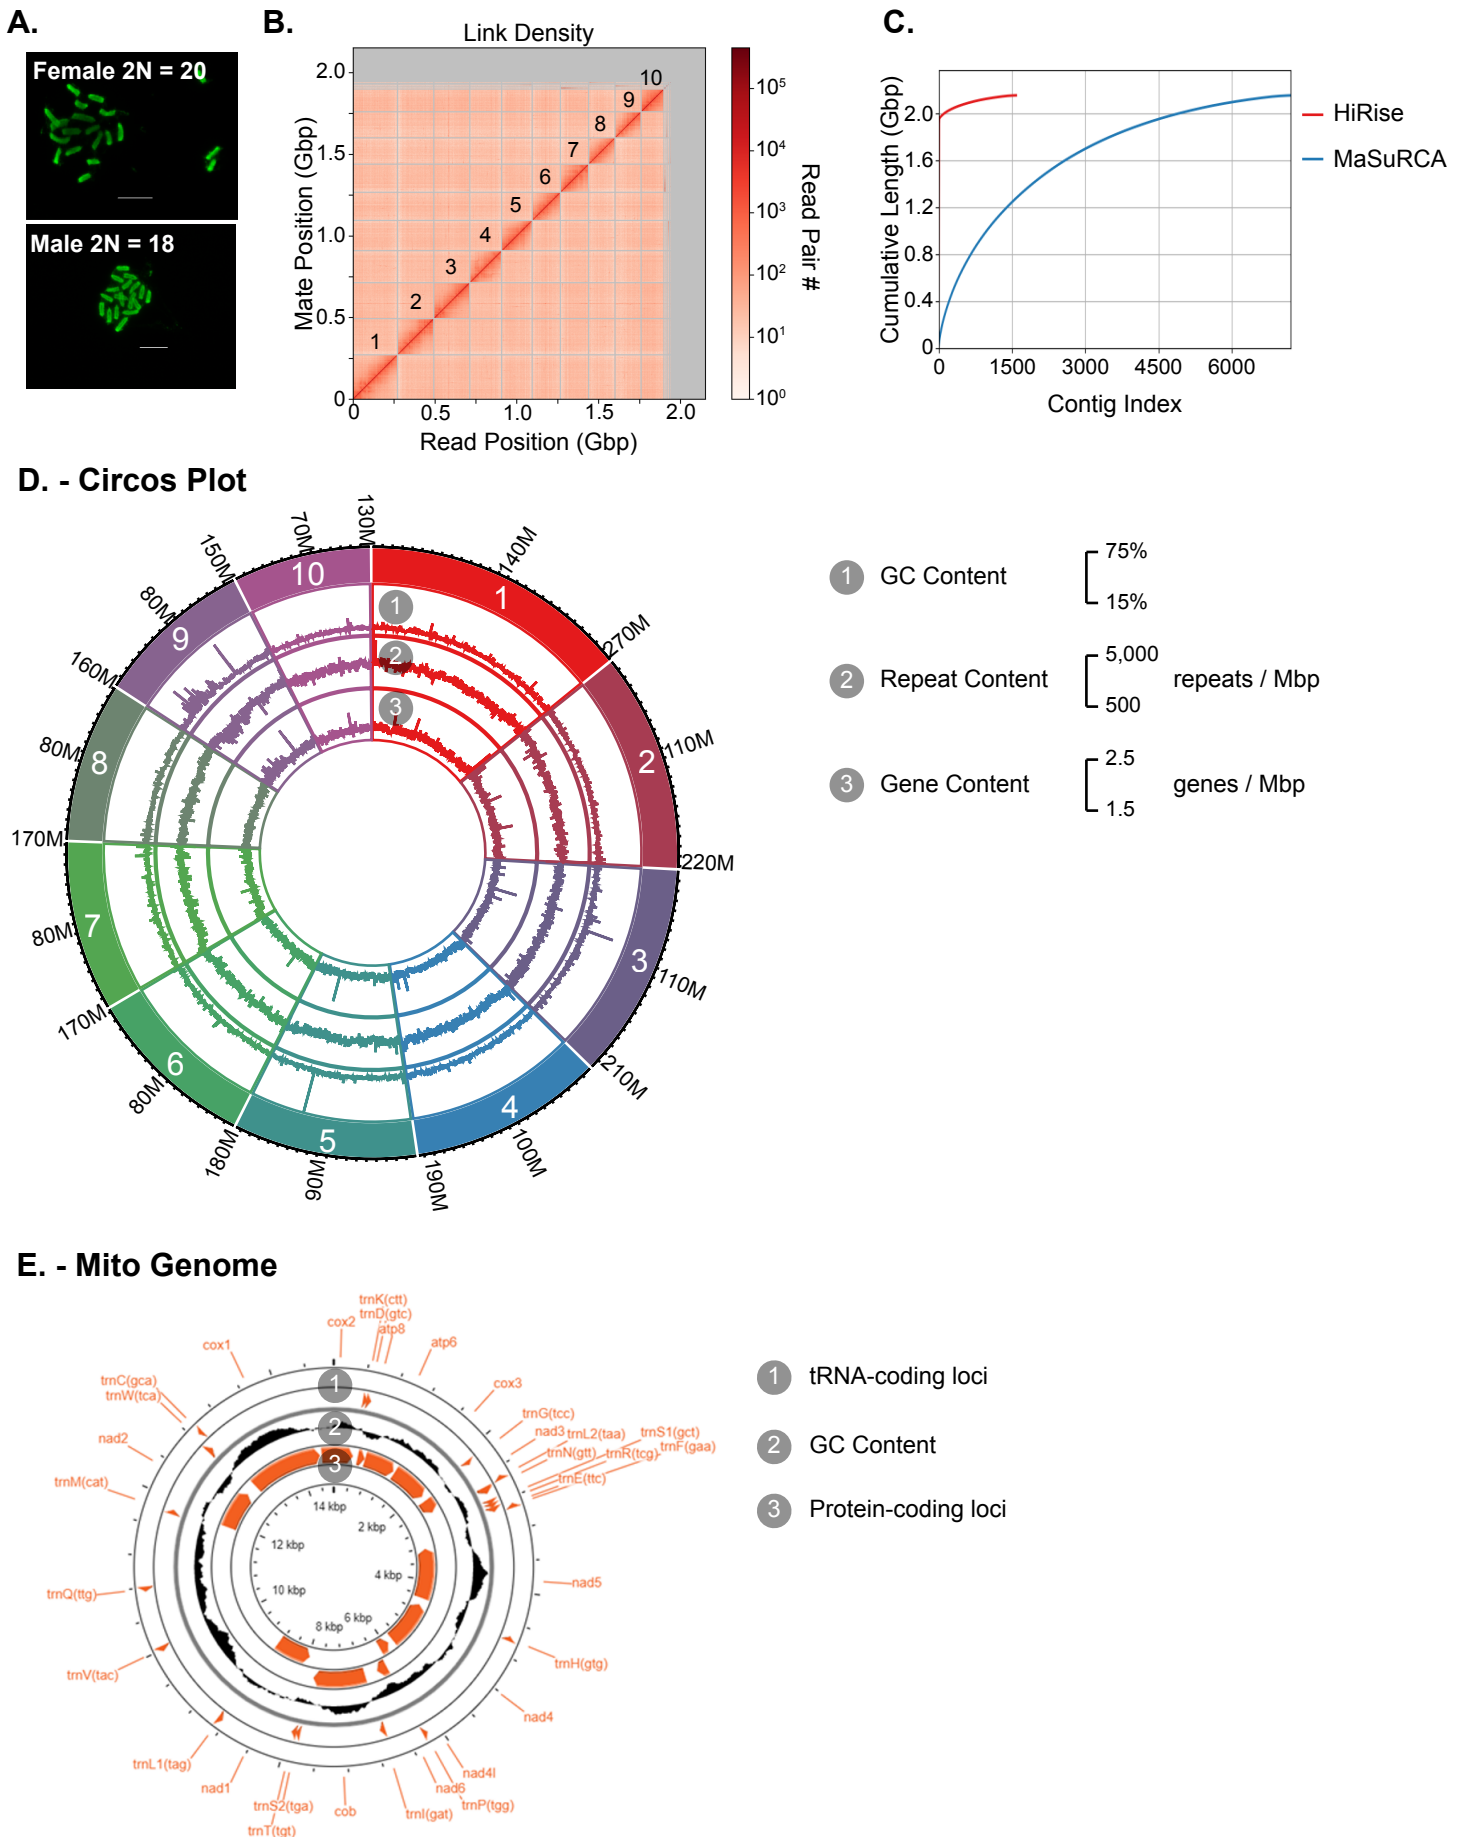

## Figure 4

**A.**

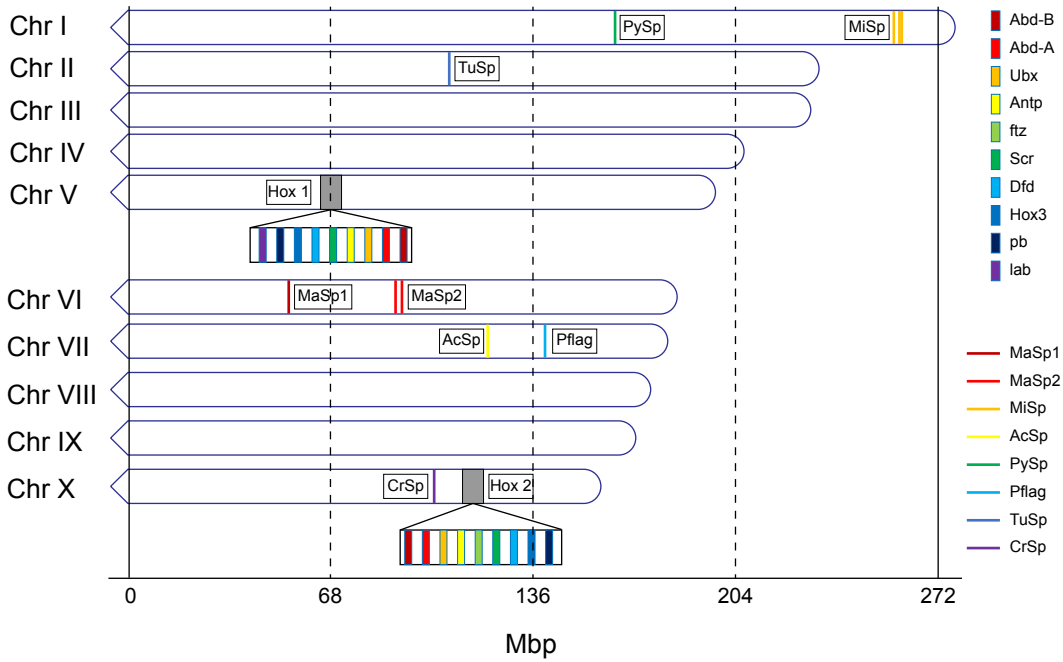

**B.**

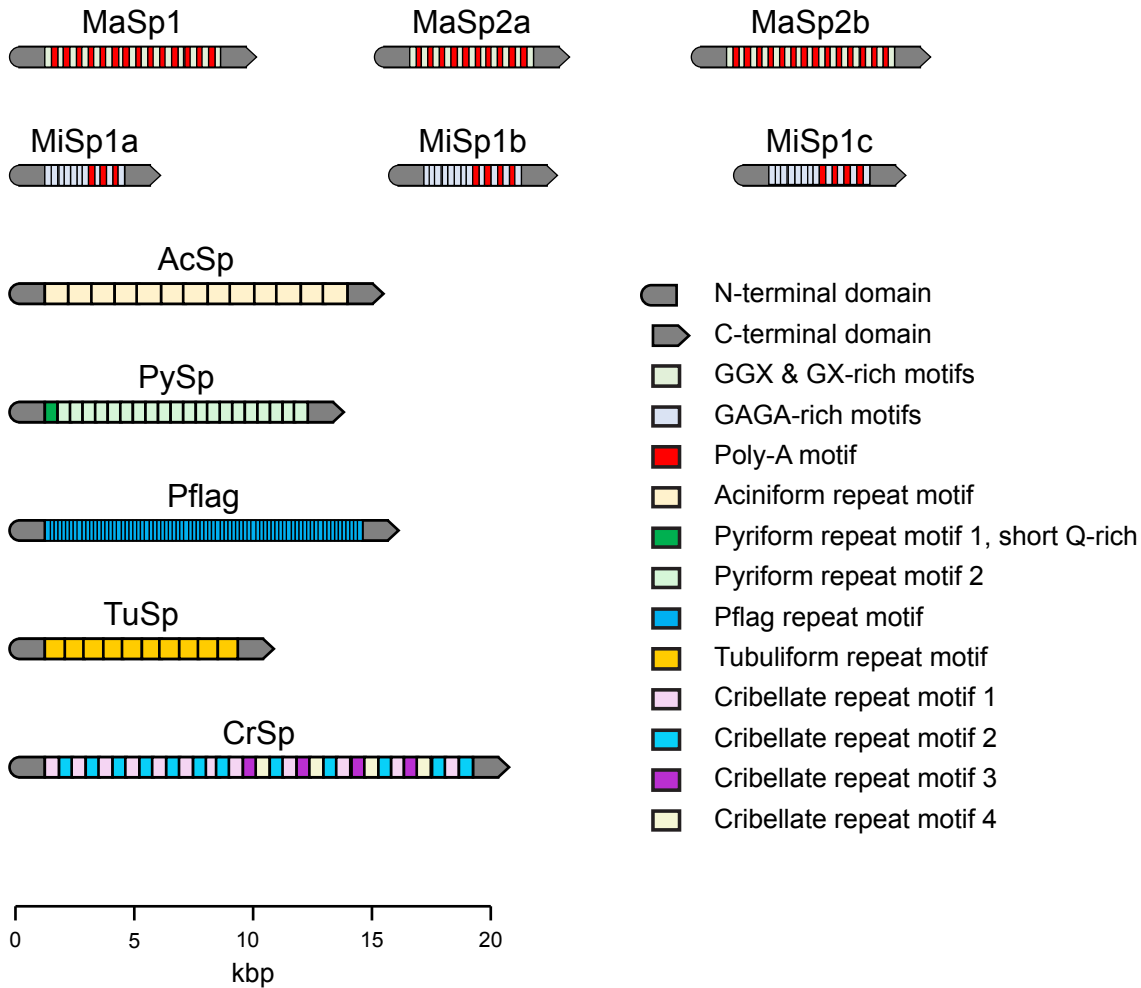

## Figure 5

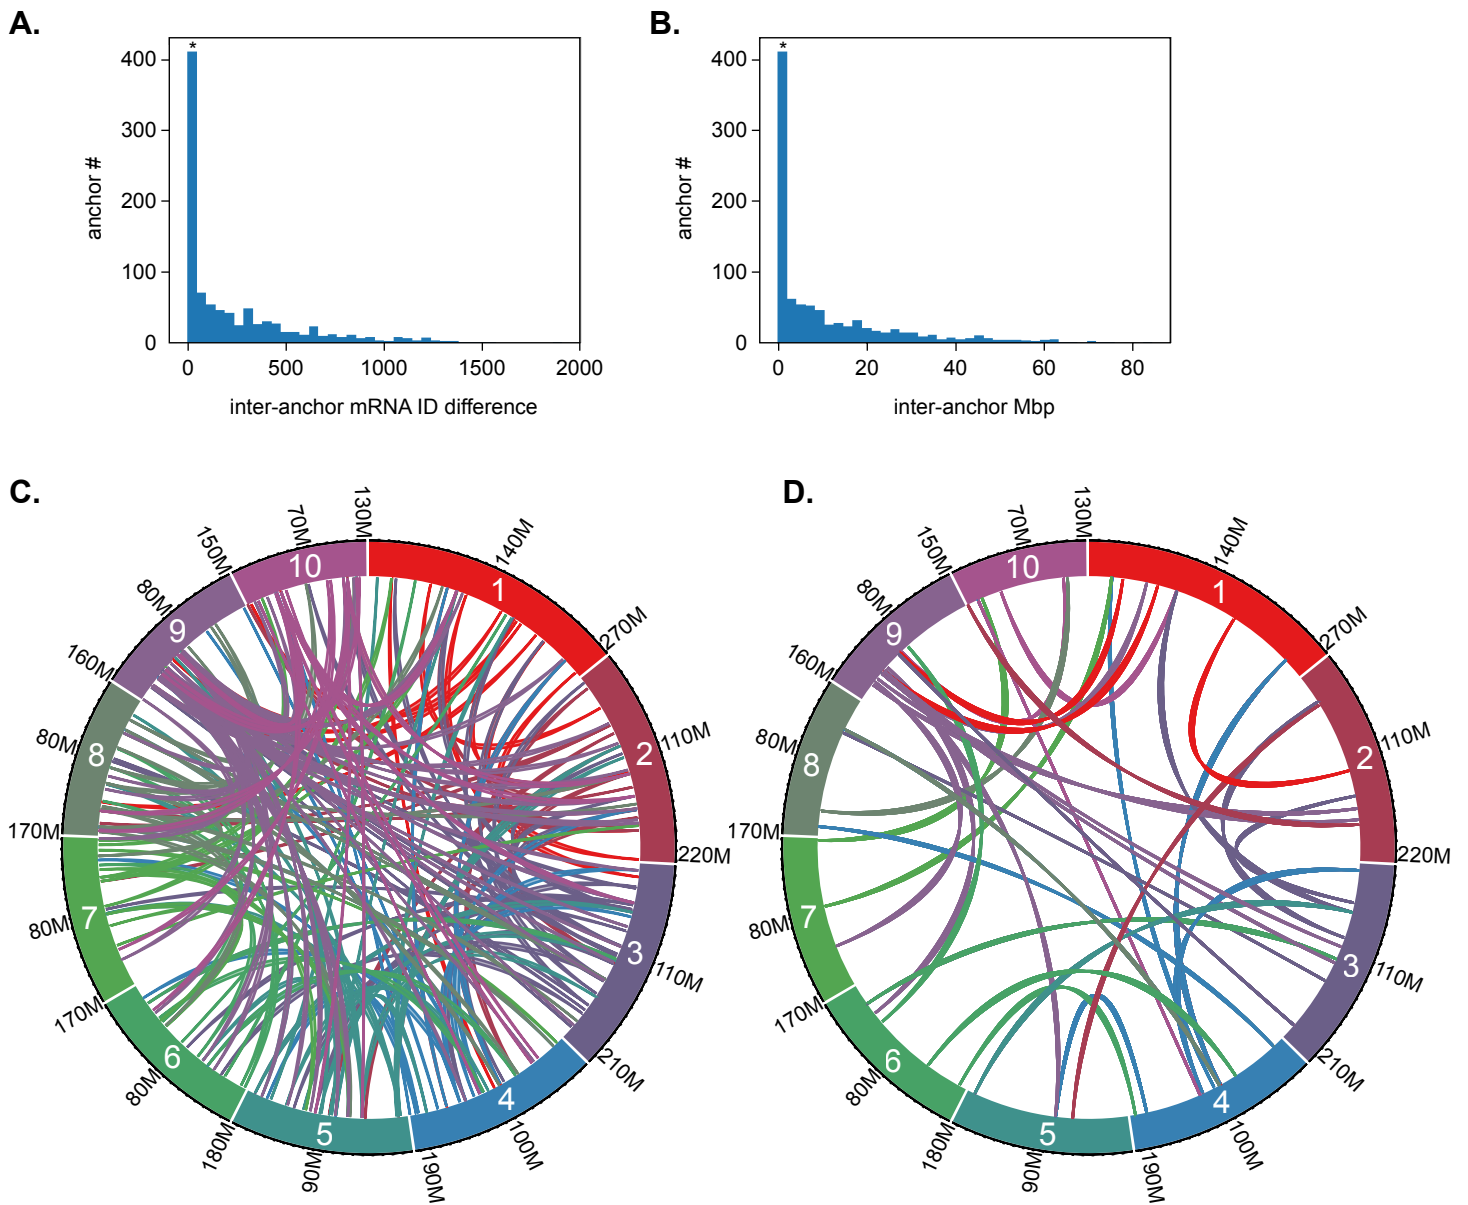

## Figure 6

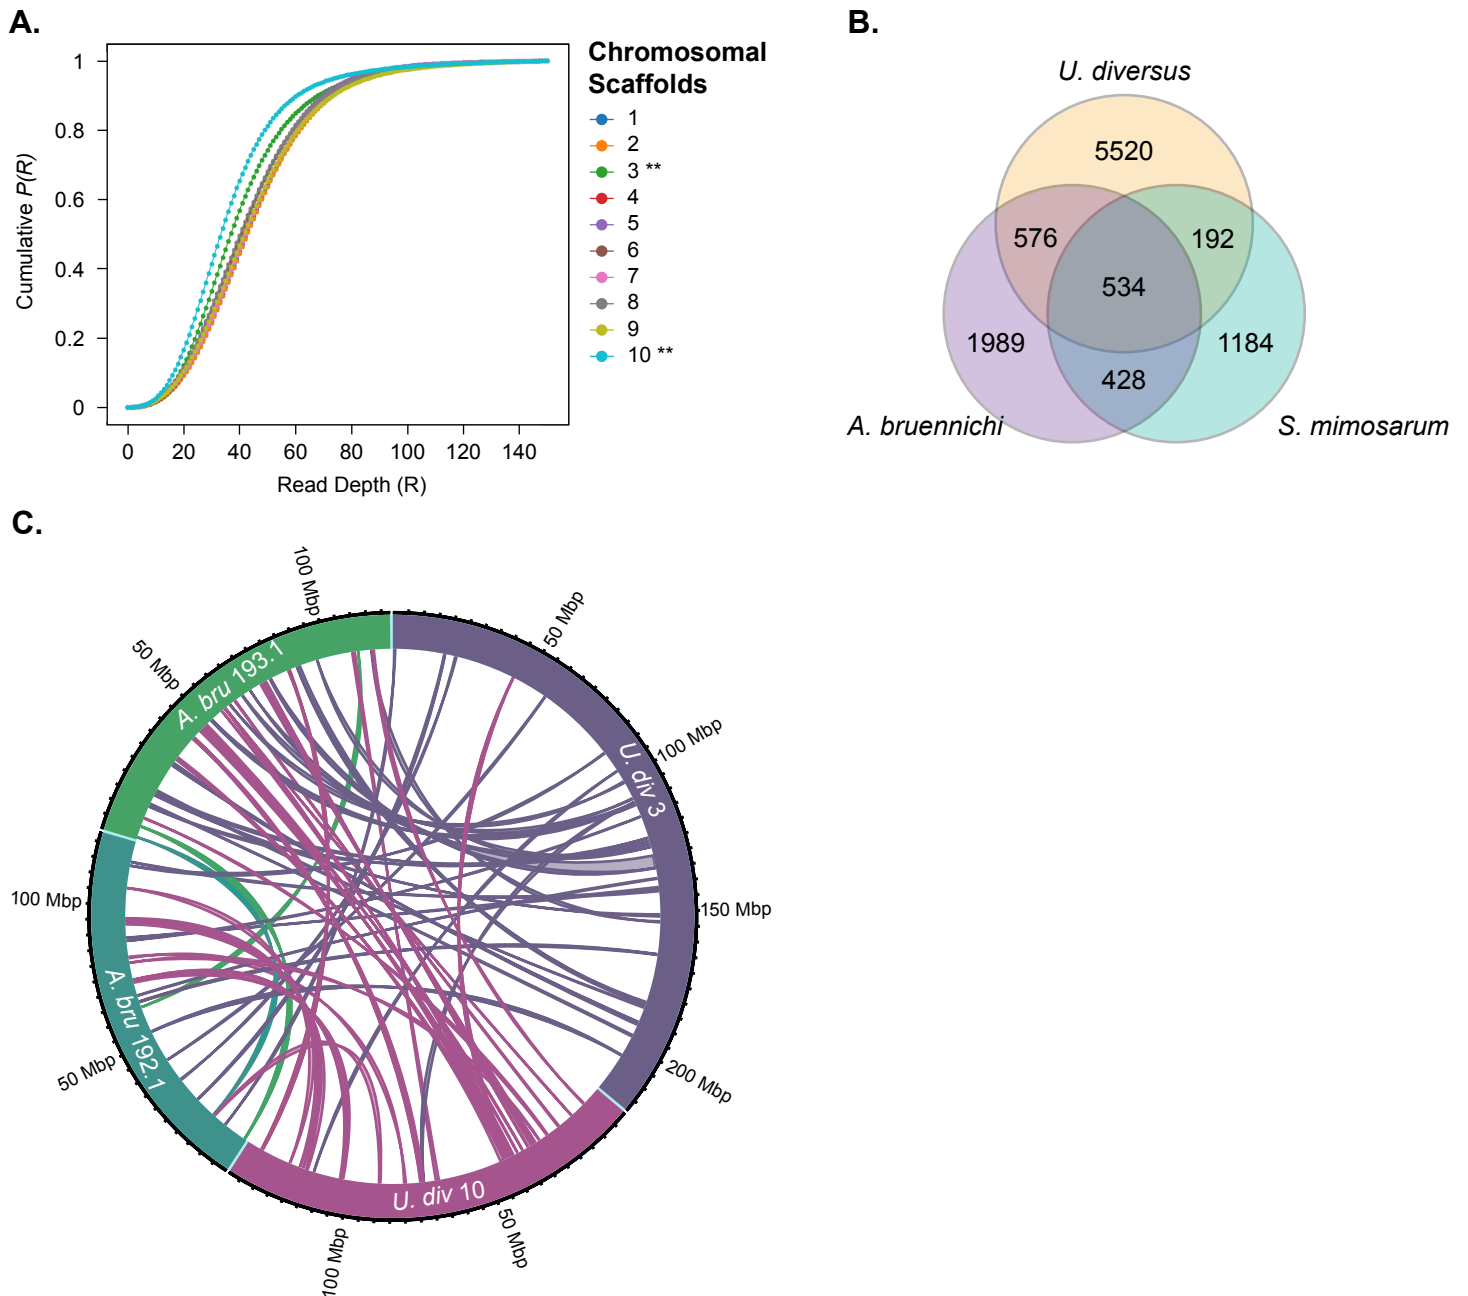

**Table 1. Summary of Sequencing Library Statistics**

| Library Type  | Instrument   | Mean Read Length                          | Number of Reads or Read Pairs                      | Bases Sequenced                            | Coverage (X) <sup>a</sup>          |
|---------------|--------------|-------------------------------------------|----------------------------------------------------|--------------------------------------------|------------------------------------|
| Illumina      | NovaSeq 6000 | 2 x 150 bp                                | 795 million (female) 937 million (male)            | 119.3 Gb (female) 46.8 Gb (male)           | 60 (female) 24 (male)              |
| ONT           | PromethION   | 6.7 kb                                    | 14.7 million                                       | 98.4 Gb                                    | 50                                 |
| PacBio        | Sequel II    | 12.8 kb (subreads)<br>13.0 kb (consensus) | 34.9 million (subreads)<br>2.0 million (consensus) | 412.8 Gb (subreads)<br>26.2 Gb (consensus) | 208 (subreads)<br>13.1 (consensus) |
| Chicago Hi-C  | HiSeq X      | 2 x 150 bp                                | 286 million                                        | 85.8 Gb                                    | 21b<br>43c                         |
| Dovetail Hi-C | HiSeq X      | 2 x 150 bp                                | 537 million                                        | 161.1 Gb                                   | 1,009b<br>81c                      |

<sup>a</sup> Based on in silico genome size estimate of 1.98 Gb by *k*-mer analysis with GenomeScope 2.0

<sup>b</sup> Physical coverage, defined as the number of read pairs that span a base pair

<sup>c</sup> Sequence coverage, defined as number of times a base pair is directly observed in sequencing data



**Table 2. Summary of *Uloborus diversus* Draft Genome Assembly Statistics**

|                                 | <i>U. div v.1.0</i> |                 | <i>U. div v.1.1</i> |                 | <i>U. div v.1.2</i> |                 | <i>U. div v.1.3</i> |                 | <i>U. div v.2.0</i> |                 | <i>U. div v.3.0</i> |                 | <i>U. div v.3.1</i> |                 |
|---------------------------------|---------------------|-----------------|---------------------|-----------------|---------------------|-----------------|---------------------|-----------------|---------------------|-----------------|---------------------|-----------------|---------------------|-----------------|
|                                 | Contigs             | Scaffolds       | Contigs             | Scaffolds       | Contigs             | Scaffolds       | Contigs             | Scaffolds       | Contigs             | Scaffolds       | Contigs             | Scaffolds       | Contigs             | Scaffolds       |
| Total Length                    | 3,218,774,062       |                 | 3,218,805,127       |                 | 2,798,889,957       |                 | 2,802,061,857       |                 | 2,122,354,655       |                 | 2,151,304,433       |                 | 2,151,890,133       |                 |
| Number of Contigs / Scaffolds   | 68,581              | 68,259          | 68,581              | 66,417          | 50,738              | 48,632          | 55,142              | 21,317          | 9,997               | 9,734           | 7,467               | 7,197           | 7,713               | 1,586           |
| Largest Contig / Scaffold       | 3,987,394           | 3,987,394       | 3,987,394           | 6,446,995       | 3,987,394           | 6,446,995       | 3,987,394           | 367,325,988     | 4,617,239           | 4,617,239       | 5,877,357           | 5,877,357       | 5,877,357           | 272,330,431     |
| Mean Contig / Scaffold Length   | 46,933              | 47,155          | 46,933              | 48,463          | 55,162              | 57,552          | 50,756              | 131,447         | 212,298             | 218,035         | 288,107             | 298,916         | 278,918             | 1,356,803       |
| Median Contig / Scaffold Length | 21,841              | 21,923          | 21,841              | 21,546          | 23,184              | 22,648          | 24,516              | 12,994          | 137,429             | 218,035         | 166,676             | 175,879         | 168,537             | 94,191          |
| Smallest Contig / Scaffold      | 1,106               | 1,667           | 1,106               | 1,667           | 1,106               | 1,667           | 10                  | 312             | 10,045              | 10,045          | 10,045              | 10,045          | 380                 | 10,220          |
| N10 / L10                       | 558,595 / 374       | 564,850 / 373   | 558,595 / 374       | 686,213 / 308   | 613,610 / 302       | 744,166 / 249   | 432,729 / 4,437     | 367,325,988 / 1 | 1,100,324 / 132     | 1,100,324 / 132 | 1,705,719 / 86      | 1,715,742 / 84  | 1,564,267 / 91      | 272,330,431 / 1 |
| N20 / L 20                      | 330,632 / 1,135     | 332,714 / 1,131 | 330,632 / 1,135     | 395,570 / 943   | 375,534 / 894       | 452,633 / 744   | 271,565 / 1,278     | 289,477,137 / 2 | 711,683 / 383       | 713,631 / 382   | 1,147,222 / 244     | 1,163,865 / 241 | 1,032,642 / 237     | 221,850,441 / 2 |
| N30 / L30                       | 214,753 / 2,358     | 215,989 / 2,348 | 214,753 / 2,358     | 252,183 / 1,983 | 252,860 / 1,816     | 296,524 / 1,521 | 192,451 / 2,518     | 264,078,423 / 3 | 516,155 / 741       | 518,859 / 736   | 826,976 / 467       | 844,177 / 461   | 763,983 / 509       | 218,885,758 / 3 |
| N40 / L40                       | 114,360 / 4,189     | 145,056 / 4,171 | 114,360 / 4,189     | 166,010 / 3,572 | 178,542 / 3,143     | 205,473 / 2,661 | 139,664 / 4,234     | 243,450,885 / 4 | 401,815 / 1,210     | 404,285 / 1,205 | 636,610 / 763       | 648,167 / 753   | 587,015 / 831       | 185,519,777 / 4 |
| N50 / L50                       | 97,524 / 6,913      | 98,015 / 6,885  | 97,524 / 6,913      | 108,431 / 5,994 | 126,236 / 5,019     | 142,390 / 4,302 | 103,046 / 6,850     | 241,033,576 / 5 | 326,127 / 1,798     | 328,082 / 1,789 | 487,746 / 1,150     | 496,769 / 1,133 | 452,781 / 1,250     | 185,519,777 / 5 |
| N60 / L60                       | 64,898 / 10,992     | 65,255 / 10,942 | 64,898 / 10,992     | 69,185 / 9,724  | 88,433 / 7,678      | 97,899 / 6,679  | 75,059 / 9,775      | 217,901,867 / 7 | 259,595 / 2,527     | 261,845 / 2,511 | 380,517 / 1,651     | 387,963 / 1,626 | 359,368 / 1,784     | 172,099,698 / 7 |
| N70 / L70                       | 42,949 / 17,131     | 43,310 / 17,041 | 42,949 / 17,131     | 44,720 / 15,580 | 60,079 / 11,529     | 64,377 / 10,226 | 53,001 / 14,221     | 213,666,783 / 8 | 201,138 / 3,460     | 204,029 / 3,433 | 292,644 / 2,296     | 298,089 / 2,258 | 280,097 / 2,463     | 161,310,338 / 8 |
| N80 / L80                       | 28,594 / 26,353     | 28,760 / 26,208 | 28,594 / 26,353     | 29,173 / 24,561 | 38,159 / 17,400     | 39,689 / 15,782 | 35,344 / 20,692     | 183,225,947 / 9 | 148,105 / 4,686     | 151,467 / 4,638 | 206,980 / 3,169     | 211,349 / 3,116 | 200,858 / 3,369     | 159,483,530 / 9 |
| N90 / L90                       | 18,127 / 40,511     | 18,198 / 40,294 | 18,127 / 40,511     | 18,295 / 38,527 | 21,027 / 27,290     | 21,374 / 25,391 | 20,312 / 31,107     | 37,840 / 1,399  | 97,979 / 6,436      | 100,002 / 6,354 | 127,987 / 4,484     | 131,815 / 4,398 | 126,330 / 4,713     | 9,355,840 / 14  |
| N100 / L100                     | 1,106 / 68,581      | 1,667 / 68,259  | 1,106 / 68,581      | 1,667 / 66,417  | 1,106 / 50,738      | 1,667 / 48,632  | 10 / 55142          | 312 / 21,317    | 10,045 / 9,997      | 10,045 / 9,734  | 10,045 / 7,467      | 10,045 / 7,197  | 380 / 7,713         | 10,220 / 1,586  |
| Gaps                            | 322                 |                 | 2,164               |                 |                     |                 | 33,825              |                 | 263                 |                 | 270                 |                 | 6,127               |                 |
| Ns                              | 32,200              |                 | 63,265              |                 | 57,963              |                 | 3,229,863           |                 | 6,049               |                 | 6,749               |                 | 592,449             |                 |
| GC Content (%)                  | 33.78               |                 | 33.78               |                 | 33.72               |                 | 33.72               |                 | 33.83               |                 | 33.82               |                 | 33.82               |                 |

*U. div v.1.0* is the MaSuRCA assembly

*U. div v.1.1* is the MaSuRCA assembly with further scaffolding using Rascaf

*U. div v.1.2* is the MaSuRCA assembly with Rascaf and with reduction of redundancy using Pseudohaploid

*U. div v.1.3* is the MaSuRCA assembly with Rascaf and Pseudohaploid further scaffolded using Chicago and Dovetail Hi-C

*U. div v.2.0* is the PacBio IPA assembly

*U. div v.3.0* is the MaSuRCA assembly and PacBio IPA assembly merged using MaSuRCA

*U. div v.3.1* is the merged MaSuRCA/IPA assembly further scaffolded using Dovetail Hi-C

**Table 3. Summary of Uloborus diversus Draft Genome Assembly BUSCO Scores**

|             | <i>U. div v.1.0</i> | <i>U. div v.1.1</i> | <i>U. div v.1.2</i> | <i>U. div v.1.3</i> | <i>U. div v.2.0</i> | <i>U. div v.3.0</i> | <i>U. div v.3.1</i> |
|-------------|---------------------|---------------------|---------------------|---------------------|---------------------|---------------------|---------------------|
| Complete    | 94.7                | 95.4                | 95.1                | 97.0                | 92.4                | 94.1                | 94.8                |
| Single Copy | 70.9                | 72.9                | 78.4                | 84.6                | 82.1                | 82.9                | 85.2                |
| Duplicated  | 23.8                | 22.5                | 16.7                | 12.4                | 10.3                | 11.2                | 9.6                 |
| Fragmented  | 2.3                 | 1.9                 | 2.0                 | 1.2                 | 1.7                 | 1.3                 | 1.0                 |
| Missing     | 3.0                 | 2.7                 | 2.9                 | 1.8                 | 5.9                 | 4.6                 | 4.2                 |

Total BUSCOs 2,934

*U. div v.1.0* is the MaSuRCA assembly

*U. div v.1.1* is the MaSuRCA assembly with further scaffolding using Rascaf

*U. div v.1.2* is the MaSuRCA assembly with Rascaf and with reduction of redundancy using Pseudohaploid

*U. div v.1.3* is the MaSuRCA assembly with Rascaf and Pseudohaploid further scaffolded using Chicago and Dovetail Hi-C

*U. div v.2.0* is the PacBio IPA assembly

*U. div v.3.0* is the MaSuRCA assembly and PacBio IPA assembly merged using MaSuRCA

*U. div v.3.1* is the merged MaSuRCA/IPA assembly further scaffolded using Dovetail Hi-C

**Table 4. Summary of the Repeat Content of the *Uloborus diversus* Draft Genome Assembly**

| Type of Element                    | Number of Elements | Total Length  | Percent of Assembly |
|------------------------------------|--------------------|---------------|---------------------|
| Retroelements                      | 311,947            | 165,713,554   | 7.70                |
| SINEs                              | 87,037             | 46,791,087    | 2.17                |
| Penelope                           | 29,911             | 11,105,124    | 0.52                |
| LINEs                              | 151,953            | 66,189,386    | 3.08                |
| CRE/SLAC                           | 0                  | 0             | 0.00                |
| L2 / CR1 / Rex                     | 31,294             | 18,030,662    | 0.84                |
| R1 / LOA / Jockey                  | 17,662             | 9,587,620     | 0.45                |
| R2 / R4 / NeSL                     | 0                  | 0             | 0.00                |
| RTE / Bov-B                        | 40,080             | 15,062,698    | 0.70                |
| L1 / CIN4                          | 21,465             | 5,682,132     | 0.26                |
| LTR elements                       | 72,957             | 52,733,081    | 2.45                |
| BEL / Pao                          | 10,210             | 8,094,671     | 0.38                |
| Ty1 / Copia                        | 24,043             | 10,565,700    | 0.49                |
| Gypsy / DIRS1                      | 27,837             | 29,214,338    | 1.36                |
| Retroviral                         | 10,867             | 4,858,372     | 0.23                |
| DNA transposons                    | 1,510,089          | 489,113,225   | 22.73               |
| hobo-Activator                     | 545,025            | 164,842,101   | 7.66                |
| Tc1-IS630-Pogo                     | 428,233            | 150,644,883   | 7.00                |
| En-Spm                             | 0                  | 0             | 0.00                |
| MuDR-IS905                         | 0                  | 0             | 0.00                |
| PiggyBac                           | 11,411             | 4,281,311     | 0.20                |
| Tourist / Harbinger                | 6,573              | 2,466,806     | 0.11                |
| Other (Mirage, P-element, Transib) | 2,942              | 1,822,173     | 0.08                |
| Rolling-circles                    | 229,864            | 88,460,474    | 4.11                |
| Unclassified                       | 2,482,847          | 629,886,344   | 29.27               |
| Total Interspersed Repeats         |                    | 1,284,713,123 | 59.70               |
| Small RNA                          | 20,797             | 5,420,377     | 0.25                |
| Satellites                         | 0                  | 0             | 0.00                |
| Simple repeats                     | 529,329            | 56,254,893    | 2.61                |
| Low complexity                     | 67,980             | 3,208,338     | 0.15                |
|                                    |                    | <b>Total:</b> | <b>66.58</b>        |

**Table 5. Summary of Annotation Statistics for the *Uloborus diversus* Draft Genome Assembly**

|                                              |         |
|----------------------------------------------|---------|
| Number of Gene Models                        | 45,762  |
| Minimum Gene Model Length (bp)               | 60      |
| Maximum Gene Model Length (bp)               | 408,348 |
| Average Gene Model Length (bp)               | 16,764  |
| Number of Exons                              | 222,483 |
| Average Number of Exons per Gene Model       | 5       |
| Average Exon Length (bp)                     | 237     |
| Number of Transcripts                        | 47,540  |
| Average Number of Transcripts per Gene Model | 1       |
| Number of Gene Models < 200 bp               | 37      |

**Table 6. Summary of Interproscan Results**

| Database        | Total Hits | Individual mRNAs with Hits |
|-----------------|------------|----------------------------|
| CDD             | 11047      | 6560                       |
| Coils           | 9254       | 5947                       |
| Gene3D          | 34377      | 16424                      |
| Hamap           | 270        | 260                        |
| MobiDBLite      | 44028      | 14046                      |
| PANTHER         | 46497      | 20941                      |
| Pfam            | 35843      | 19491                      |
| PIRSF           | 916        | 736                        |
| PRINTS          | 16380      | 3134                       |
| ProSitePatterns | 8222       | 3898                       |
| ProSiteProfiles | 23252      | 9922                       |
| SFLD            | 120        | 62                         |
| SMART           | 25638      | 7561                       |
| SUPERFAMILY     | 26766      | 15559                      |
| TIGRFAM         | 821        | 736                        |

**Table 7. Summary of Spidroins in the Uloborus diversus Draft Genome Assembly**

| Spidroin           | Gene Length (bp) | CDS Length (bp) | Protein Length (aa) | N-terminal Length (aa) | C-terminal Length (aa) | Signal Peptide Start | Signal Peptide Stop | Signal Peptide Probability | Signal Peptidase Cleavage Site Probability |
|--------------------|------------------|-----------------|---------------------|------------------------|------------------------|----------------------|---------------------|----------------------------|--------------------------------------------|
| Aciniform          | 14,907           | 14,907          | 4,968               | 148                    | 109                    | Met-1                | Ser-23              | 0.9955                     | 0.9056                                     |
| Pseudoflagelliform | 15,546           | 15,546          | 5,181               | 195                    | 96                     | Met-1                | Gly-29              | 0.9991                     | 0.9778                                     |
| Cribellate         | 20,198           | 20,115          | 6,704               | 874                    | 296                    | Met-1                | Gly-23              | 0.9997                     | 0.9805                                     |
| Major Ampullate 2a | 7,317            | 7,317           | 2,438               | 165                    | 100                    | Met-1                | Gly-25              | 0.9997                     | 0.9662                                     |
| Major Ampullate 2b | 9,141            | 9,141           | 3,046               | 195                    | 109                    | Met-1                | Gly-25              | 0.9687                     | 0.9992                                     |
| Minor Ampullate 1a | 5,523            | 5,523           | 1,840               | 242                    | 95                     | Met-1                | Gly-23              | 0.9998                     | 0.9643                                     |
| Minor Ampullate 2a | 6,255            | 6,255           | 2,084               | 254                    | 99                     | Met-1                | Gly-23              | 0.9998                     | 0.9670                                     |
| Minor Ampullate 2b | 6,432            | 6,432           | 2,143               | 254                    | 98                     | Met-1                | Gly-23              | 0.9998                     | 0.9670                                     |
| Pyriiform          | 13,179           | 13,179          | 4,392               | 168                    | 266                    | Met-1                | Gly-23              | 0.9997                     | 0.9768                                     |
| Tubuliform         | 10,146           | 10,146          | 3,381               | 179                    | 346                    | Met-1                | Ala-25              | 0.9993                     | 0.9808                                     |
